1 **Live-imaging reveals Coordinated Cell Migration and Cardiac Fate Determination**  
2 **during Mammalian Gastrulation.**

3 Shayma Abukar<sup>1,2</sup>, Peter A. Embacher<sup>3</sup>, Alessandro Ciccarelli<sup>4</sup>, Sunita Varsani-Brown<sup>4</sup>, Jamie  
4 A. Dean<sup>3</sup>, James Briscoe<sup>4</sup>, Kenzo Ivanovitch<sup>1,\*</sup>

5 <sup>1</sup>Developmental Biology of Birth Defects, Institute of Child Health, University College  
6 London, 30 Guilford Street, London WC1N 1EH, UK

7 <sup>2</sup>Institute of Cardiovascular Science, University College London, Gower Street, London  
8 WC1E 6BT, UK

9 <sup>3</sup>Department of Medical Physics and Biomedical Engineering, University College London,  
10 Gower St, London WC1E 6BT, UK

11 <sup>4</sup>The Francis Crick Institute, 1 Midland Road, London NW1 1AT, UK

12 \* Corresponding author

13 E-mail: [k.ivanovitch@ucl.ac.uk](mailto:k.ivanovitch@ucl.ac.uk) ([K.I.](#))

14 **Abstract**

15 Heart development involves the specification of distinct sets of cardiac progenitors at various  
16 times and locations during ontogeny. Here, we used live imaging in mice from the initiation  
17 of gastrulation to heart tube formation stages to investigate the origin and migratory paths of  
18 cardiac progenitors. We tracked individual mesodermal cells, reconstructing the lineage tree  
19 of the cells and fates for up to four generations. Our findings revealed independent unipotent  
20 progenitors originating at specific times that exclusively contribute to the left  
21 ventricle/atrioventricular canal (LV/AVC) or atrial myocytes. LV/AVC progeny  
22 differentiated into myocytes early, forming the cardiac crescent, while atrial progenitors  
23 differentiated later and contributed to the venous poles of the heart tube during  
24 morphogenesis. We also identified short-lived bipotent and tripotent mesodermal progenitors  
25 that contribute to a diverse array of mesodermal cell types, illustrating early plasticity during  
26 gastrulation. Sister cells generated by multipotent progenitors dispersed more and adopted  
27 more diverse migratory trajectories within the anterior mesoderm space than those from  
28 unipotent progenitors. Together the data reveal the regulation of individual cell directionality  
29 and cardiac fate allocation within the seemingly unorganised migratory pattern of mesoderm  
30 cells.

31

## 32 **Introduction**

33 How cell fate specification and morphogenesis are coordinated in time and space to generate  
34 tissues and organs of unique forms and functions is central to developmental biology. This is  
35 evident during gastrulation when mesodermal cells acquire diverse cardiac fates and engage  
36 in complex cell movements to generate spatial patterns, such as a cohesive cardiac crescent,  
37 which transforms into a primitive heart tube.

38 Clonal analysis establishes lineage relationships between progenitors and their derivatives. In the  
39 gastrulating mouse embryo, tracking the derivatives of single progenitors led to the finding that  
40 progenitors are assigned to specific anatomical locations in the heart prior to the formation of the  
41 heart fields [1-4]. Unipotent *Mesp1*+ progenitors are solely destined for the left ventricle (LV)  
42 and atria myocardium can be distinguished from unipotent endocardium progenitors [2].

43 Additional clonal analysis of *Hand1*+ progenitors located at the embryonic/extraembryonic  
44 boundary in the early gastrulating embryo identified bipotent and tripotent progenitors. These  
45 progenitors generated LV/AVC myocytes in addition to pericardium, epicardium, and  
46 extraembryonic tissues [1].

47 One limitation of clonal analysis, however, is that the history of the cells is *deduced* by  
48 analysing descendants at the endpoint. It does not allow the identification of the progenitors'  
49 initial locations or subsequent migratory paths in the embryo. Single-cell tracking in live-  
50 imaging is needed for this and is the most rigorous approach to reconstituting cell lineages,  
51 identifying when cardiac progenitors become lineage-restricted during gastrulation and  
52 enabling migration analysis [5].

53 A recent live-imaging analysis uncovered the dynamics of mesodermal cell migration during  
54 mouse gastrulation [6]. This analysis revealed that cells dispersed extensively in the embryo,  
55 with clearly separate movements of daughter cells, suggesting cell identity may not be fixed  
56 but instead influenced by the position of the cells at the end of the migration period.  
57 However, as Dominguez et al. discussed, the motility of mesodermal cells is unlikely to be  
58 completely random. There may be some regulation of directionality of individual cell  
59 migration to ensure progeny migrate to their correct locations and establish spatial patterns,  
60 including the cardiac crescent and distinct LV/AVC and atrial progenitor domains [7-9].  
61 Indeed, a previous migration analysis showed mesodermal cell migrate with directionality  
62 during mouse gastrulation [10]. Thus, early mammalian mesoderm migration may exhibit  
63 some degree of determinism. This is reminiscent of an evolutionarily distinct species, the  
64 ascidian, in which a small number of genealogically related and determined heart progenitors  
65 migrate with predetermined directionally [11]. However, it is not known whether progenitors  
66 adopt more stereotypical migratory trajectories, once committed to specific cardiac fates in  
67 the context of mammalian gastrulation.

68 Here, through long-term live imaging and single-cell tracking in mice, spanning from the  
69 initiation of gastrulation to the stages of heart tube formation, our goal was to reconstitute the  
70 lineage tree of cells and assess how the migratory paths of cells relate to their eventual  
71 cardiac fate within the seemingly unorganised migration pattern.

## 72 **Results**

### 73 **Development and characterisation of *cTnnT-2a-eGFP* mice**

74 To track cardiomyocytes in vivo, we developed a knock-in mouse reporter line *cTnnT-2a-*  
75 *eGFP* where the *eGFP* sequence is inserted downstream of the endogenous *cardiac troponin*

76 *T* (*cTnnT*) loci. A virus-derived 2a self-cleaving peptide inserted between the *cTnnT* and  
77 *eGFP* coding sequence ensures co-expression of both cTnnT and eGFP proteins (Fig.1 A)  
78 [12]. The *cTnnT-2a-eGFP* line was maintained as homozygotes. Animals are viable and  
79 indistinguishable from heterozygotes. Whole-mount immunostaining for cTnnT confirmed  
80 specific eGFP expression in cTnnT+ cardiomyocytes at E8 -heart tube stage- and E12.5  
81 (Fig.1 B-C).

82 We first analysed cardiac differentiation dynamics in real time using multiphoton live-  
83 imaging and the cardiomyocyte *cTnnT-2a-eGFP* reporter line (Fig.1 D). We combined the  
84 *cTnnT-2a-eGFP* reporter with the *Bre:H2BCerulean* BMP reporter [7], which expressed  
85 cerulean in the lateral plate mesoderm. We found initial sparse GFP positive cells appearing  
86 within the Bre-Cerulean positive lateral plate mesoderm at E7.5 - consistent with initial  
87 sparse cTnnT protein distribution found in the lateral plate mesoderm [13]. This was followed  
88 by the establishment of the cardiac crescent epithelium-like structure and primitive heart tube  
89 (Fig.1 D). We conclude that the *cTnnT-2a-eGFP* reporter faithfully identifies cardiomyocytes  
90 among a population of lateral plate mesodermal cell derivatives.

### 91 **Establishing long term light-sheet live microscopy for cardiac lineages analysis**

92 Using live-imaging and single-cell tracking in conjunction with the cardiomyocyte *cTnnT-2a-*  
93 *eGFP* live-reporter, we set out to reconstitute the lineage trees of mesodermal cells and  
94 identify the initial mesodermal progenitors that contribute solely to the heart tube in the  
95 gastrulating mouse embryo (Fig.2 A). To achieve this required culturing and imaging early  
96 mouse embryos from the onset of gastrulation to the heart tube stage (i.e. ~25-35 hours).

97 We found the Viventis LS1 open-top light-sheet microscope allowed the culture of early  
98 mouse embryos over long periods of embryonic development (>24 hours). Incubation media

99 was stable and could be exchanged during acquisition. A large media volume (~1ml)  
100 improved embryonic viability for long-term imaging. Embryos cultured from E6.5 and for 35  
101 hours developed normally; a cardiac crescent formed and generated a heart tube  
102 corresponding to E8 embryos.

103 To permanently label mesodermal cells and their progeny at a density suitable for live cell  
104 tracking, we used an inducible  $T^{2a-cre/ERT2}$  mouse combined with  $R26^{tdTomato}$  reporter and  
105 administered intermediate doses of tamoxifen (0.002mg/bw) at stages encompassing E5 to  
106 E6.5 [7]. We first administered tamoxifen earlier – (at E5) - and cultured embryos in  
107 tamoxifen-free culture media, from before the start of the gastrulation period and onset of  
108 T/Bra expression in the primitive streak and mesoderm – (at E6) -. In these conditions, no  
109 tdTomato expressing cells could be identified in the intra-embryonic mesoderm over ~11  
110 hours of live-imaging acquisition (Figure 2-supplementary figure 1 A). This confirms that  
111 creERT2 activity in  $T^{2a-cre/ERT2}$  embryos requires *T/Bra* expression [7]. In the absence of  
112 tamoxifen, rare tdTomato-positive cells were identified in only one embryo (not shown),  
113 confirming that tdTomato widespread mesodermal expression in  $T^{2a-cre/ERT2}$   $R26^{tdTomato}$  embryos  
114 requires tamoxifen.

115 We generated three light-sheet live-imaging datasets spanning 23 to 35 hours of mouse  
116 embryonic development from gastrulation – (E6.5-E7) - to heart tube stage (Fig.2 B and  
117 Videos 1-3). Embryos were imaged for 1 minute at 2 minutes intervals. Raw data amounts to  
118 5-7 terabytes per experiment, representing up to half a million images. To correct for drift  
119 during acquisition, BigSticher [14] was used to register the datasets in 4D as previously  
120 described [6]. Movies were synchronised according to the timing of appearance of the cardiac  
121 crescent and heart tube inflows (Figure 2-supplementary figure 2 A-K).

122 Each movie contains up to ~1000 time points, and a small percentage (<1%) of linkage  
123 inaccuracy between cells could lead to lineage misinterpretation that propagates over the  
124 course of the movie. Automated cell tracking methods have seen advancements [15, 16].  
125 However, achieving the level of precision necessary to reconstitute cell lineages remains  
126 challenging. To obtain accurate cell lineages, we manually tracked single cells by visualising  
127 them at successive time points from the beginning to the end of the movie using Massive  
128 Muti-view Tracker (MaMut) [5] (Videos 1-3). We interrupted a track when it was impossible  
129 to identify the same cell across two successive time points unequivocally. A total of 61  
130 mother cells were tracked for up to 4 generations.

131 We determined the identity of the final daughters based on their location in the heart tube.  
132 The heart tube is formed by an inner endocardial layer ensuring the presence of a circulatory  
133 system, a myocardial layer formed by cTnnT positive cardiomyocytes and derived from the  
134 splanchnic mesoderm, and an outer layer derived from the somatic mesoderm called the  
135 pericardium. We could discriminate these cell types in our live-imaging datasets (Videos 4-  
136 6). Moreover, endocardial cells had distinct spindle-like shapes, displaying protrusions and  
137 transmigrating across the myocardium (Fig. 4D and Video 6, n=4). Cardiomyocytes were  
138 further distinguished by their higher levels of *cTnnT-2a-eGFP* reporter expression (Material  
139 and Methods and Figure 2-supplementary figure 3 A-D). Finally, the locations of the  
140 myocyte *cTnnT-2a-eGFP*<sup>+</sup> cells within the heart tube indicated their fates. The heart tube has  
141 an inverted Y shape, and the two arms of the Y -or inflows-, positioned inferiorly, are fated to  
142 become the atria, with the stem of the Y becoming the left ventricle (LV) and atrioventricular  
143 canal (AVC) [17]. In what follows, we describe the lineage trees and timing for mesodermal  
144 progenitors' specification into distinct cardiac lineages.

145 **Distinct mesoderm contributes to the heart tube and inflows myocardium.**

146 We first addressed the timing of LV/AVC and atria myocyte lineage segregation. From our 3  
147 datasets, we identified 29 progenitors contributing to at least one *cTnnT-2a-eGFP+* myocyte  
148 (Fig. 3A). We analysed their progenies' locations in the heart tube and found they established  
149 a clonal boundary located at the junction between the LV/AVC and atria myocyte  
150 compartments suggesting that atrial and LV/AVC progenitors have distinct mesodermal  
151 origins (Fig.3 Bi-iii and Figure 3-supplementary Figure 1 Ai-vi). Among these 29  
152 progenitors, 14 contributed to the LV/AVC and 13 to the atria. None contributed to clones  
153 spanning the LV/AVC and atria compartments. Two additional progenitors generated *cTnnT-*  
154 *2a-eGFP+* cells in deeper z-locations within the heart tube (~ -250  $\mu$ m).

155 The LV/AVC and atrial myocyte lineages have distinct temporal origins in the mesoderm.  
156 Early mesoderm contributed to the LV/AVC, while late mesodermal cells generated atrial  
157 myocytes. (Fig. 3Bi). This observation is in line with the previous hypothesis that atrial and  
158 LV/AVC compartments have distinct spatial and temporal origins during gastrulation in the  
159 mouse [7-9].

160 The LV/AVC progenitors are born first and differentiate into *cTnnT-2a-eGFP+* myocytes  
161 before other cardiomyocytes. This establishes the initial cardiac crescent within a ~10-hour  
162 period with the first LV/AVC progeny differentiating at ~E6.5 + 15 hours and the last at  
163 ~E6.5 + 25-27 hours. Atrial progenitors are born the latest, differentiate the latest - from  
164 ~E6.5 + 25-27 hours -, and are recruited to posterior regions during the folding of the cardiac  
165 crescent into the heart tube. This establishes the inflows (Fig.3 D-E and H-I). A subset of  
166 mesoderm progenitors located in the inflow regions did not become *cTnnT-2a-eGFP+* (n=6);  
167 however, these cells may become positive at later stages.

168 Myocytes developed concurrently within each lineage (Fig.3 F). The time intervals between  
169 the first and the last daughter to transition into *cTnnT-2a-eGFP+* myocytes were 2 hours and



170 30 minutes on average for LV/AVC lineages, and 2 hours and 35 minutes on average, for  
171 atrial lineages. Notably, the differentiation timing varied among lineages, with some  
172 displaying greater synchrony than others. For instance, in 3 out of 29 lineages, the mother cell  
173 generated LV/AVC *cTnnT-2a-eGFP*<sup>+</sup> myocyte daughters in more than 5 hours. In contrast,  
174 in 8 out of 26 lineages, all daughters transitioned into *cTnnT-2a-eGFP*<sup>+</sup> myocytes in less than  
175 one hour.

176 Together, the live-imaging analysis shows that the heart tube is established by at least two  
177 sets of independent LV/AVC and atrial myocyte progenitors generated from early and late  
178 mesoderm and differentiating into myocytes at different embryonic stages.

#### 179 **Identification of unipotent, bipotent and tripotent cardiac progenitors.**

180 We next sought to address if mesodermal progenitors contributing to the LV/AVC myocytes  
181 had the potential to generate additional mesodermal lineages. We identified unipotent  
182 LV/AVC progenitors contributing only to *cTnnT-2a-eGFP*<sup>+</sup> myocytes (n=9/14) (Fig.3 A, C  
183 and H-H'). However, challenging the notion that mesodermal lineages are locked into  
184 specific fates early [18], we found bipotent progenitors contributing to LV/AVC myocytes  
185 and the endocardium (n=2/14) (Fig.3 A and Fig.4 C, C') as well as the LV/AVC myocytes  
186 and extraembryonic mesoderm (n=1/14) [1]. We also found tripotent progenitors contributing  
187 to LV/AVC myocytes, extra-embryonic mesoderm, and pericardium (n=1/14) and LV/AVC  
188 myocytes, endocardium and extra-embryonic mesoderm (n=1/14) (Fig.3 A and Fig. 4 -  
189 supplementary Figure 1 A, A').

190 LV/AVC myocyte progenitors were located in the proximal mesoderm, intermingled with  
191 additional progenitors contributing to exclusively non-myocyte *cTnnT-2a-eGFP*<sup>-</sup> cardiac  
192 lineages (n=8). We identified unipotent pericardial and endocardial progenitors (n=5/8)

193 (Fig.3 A and Fig.4 A, A') and bipotent progenitors generating endocardial and extra-  
194 embryonic mesodermal cells (n=2/8) (Fig.3 A and Fig.4 B, B') and endocardial and  
195 embryonic mesodermal cells (n=1/8) (Fig.3 A). An additional bipotent progenitor located in  
196 proximity to an LV/AVC myocyte progenitor (cell-cell distance: 29  $\mu$ m), generated highly  
197 migratory endothelial-like daughter cells located in the embryonic mesoderm and extra-  
198 embryonic mesoderm (Fig.3 A and Fig.4 E, E').

199 Bipotent progenitors contributing to cardiac and extra-embryonic mesodermal cells were  
200 preferentially located at the extra embryonic/embryonic border (Fig.3 C). However, other  
201 bipotent/tripotent progenitors were intermingled with unipotent LV/AVC progenitors within  
202 the proximal mesoderm, with no clear spatial pattern identifiable. The initial cells' locations  
203 in the early proximal mesoderm seems, therefore, not to correlate with specific mesodermal  
204 fates. However, tracking a greater number of cells would be required to fully address this  
205 question. In line with previous live-imaging analyses [6, 7], the distal mesoderm migrated to  
206 more medial locations (Fig.3 C -dark red cells), known to provide progeny for the right  
207 ventricle, outflow tract and branchiomic muscles [19-22].

208 In the late mesoderm, we identified 6 unipotent atrial myocyte progenitors out of the 13  
209 progenitors contributing to the *cTnnT-2a-eGFP+* atria myocytes. Longer tracks  
210 encompassing later stages are required to determine if the remaining progenitors contribute to  
211 atria *cTnnT-2a-eGFP+* myocytes entirely or also to additional lineages. Moreover, we found  
212 additional progenitors contributing exclusively to *cTnnT-2a-eGFP-* daughters located in the  
213 inflow's regions of the heart tube and posterior lateral plate mesoderm (n=16 lineages,  
214 identified as meso GFP- in Fig.3 A). Additional markers or longer movies will be required to  
215 determine the identity of these cells. A subset of these cells had spindle-like shapes and were  
216 identified as endothelial-like cells (n=6, Fig.3 A).

217 Together, the live imaging analysis of lineages shows that the early mesodermal cells harbour  
218 a previously underappreciated plasticity and diversity of fates during gastrulation [1]. Yet,  
219 their ability to alternate fates seems to be rapidly reduced. 20 out of 35 initial mother cells  
220 contributing to cardiac fates were unipotent, and in all cardiac lineage trees with two or three  
221 fates (n=8), progeny become lineage-restricted early, during migration, before the onset of  
222 *cTnnT-2a-eGFP*<sup>+</sup> expression in the embryo (Fig.3 G). All 6 bipotent progenitors analysed  
223 generated unipotent progenitors after the first cell division; and the two tripotent progenitors  
224 generated unipotent daughters after the first and second cell division (Fig.3 A). These results  
225 are consistent with previous clonal analyses suggesting that early mesodermal progenitors are  
226 rapidly specified into discrete fates after the initiation of gastrulation [2-4].

#### 227 **Migration analysis in lineages reveal hidden patterns of cell migration.**

228 Previous live analysis of cell trajectories during gastrulation revealed apparently chaotic  
229 individual cell movements during migration [6]. Consistent with this analysis, we found that  
230 mesodermal cells dispersed extensively during migration with strong separating movements  
231 between daughter cells (Fig.5 A). We analysed distances between the first two daughters  
232 (coordinates were taken 10 minutes after the first cell division - Timepoint 0 -, and last time  
233 point before the daughters' subsequent cell division - Timepoint 1 -) and granddaughters  
234 (final time point at which all granddaughter cells exist, we only considered branches lasting  
235 at least 4 hours into the cell cycle to allow sufficient cell migration - Timepoint 2 -) in each  
236 lineage. Distances between daughters and granddaughters gradually increased, reaching  
237 considerable distances within a single lineage (up to 365  $\mu\text{m}$ ) (Fig.5 A). We noted, however,  
238 that distances were highly heterogenous; a proportion of the progeny generated less  
239 dispersive daughters with separating distances of less than 50  $\mu\text{m}$  between them (11 out of 27  
240 cardiac lineages).

241 One possibility for the observed heterogeneity in these distances is that the daughters  
242 generated by unipotent progenitors exhibit less dispersive migratory paths than those  
243 generated by bipotent progenitors (Fig.5 B). To test if this correlation was true, we analysed  
244 cell movements in lineages, taking advantage of our lineage analysis from the live-imaging  
245 data.

246 We first analysed if distances between daughters and granddaughters generated by bipotent  
247 cardiac progenitors were greater than those generated by unipotent cardiac progenitors.  
248 Immediately after the first cell division, we found no distance differences between sisters  
249 generated from unipotent or bipotent progenitors. Distances between sisters with shared  
250 cardiac fates became smaller on average compared to distances between sisters of distinct  
251 cardiac fates (Fig.5 C). A similar difference was found when cell coordinates were sampled  
252 before the onset of *cTnnT-2a-eGFP* expression (Fig.5 D-H). Thus, unipotent cardiac  
253 progenitors generated less dispersed daughter and granddaughter cells than bipotent  
254 progenitors. Distances between sisters could be high in non-cardiac lineages generating only  
255 extra embryonic mesoderm, occasionally reaching distances of over 300  $\mu\text{m}$  (Fig.5 G).

256 The observation that sister cells sharing the same fate end up in the same position in the  
257 embryo may be due to these cells following the same migratory paths. Alternatively, pairs of  
258 sister cells could independently follow distinct migratory trajectories and, by chance,  
259 converge into similar embryonic territories. To address this question, we analysed if sisters  
260 harbouring a shared cardiac fate migrated in closer proximity than sisters with divergent  
261 fates. We used a dynamic time warping (DTW) algorithm (Fig.5 I and Material and Methods)  
262 that accounts for instances where cells may exhibit similar behaviours but with temporal  
263 shifts [23, 24]. We selected time periods such that sisters' trajectories started and ended at the

264 same time and calculated the cumulative distances between the two trajectories that yielded  
265 the optimal alignment in each pair of sister cells (i.e. a DTW distance).

266 On average, unipotent progenitors generated sisters with lower DTW distances than bipotent  
267 progenitors (Fig.5 J-L). We observed four case (out of 20) where a unipotent progeny  
268 generated sisters with a distinct migratory trajectory (log DTW value > 8.5), and two cases  
269 (out of 10) where bipotent progenitors produced sisters with similar migratory paths but  
270 distinct fates (log DTW value < 8.5) (Fig.5 J). This suggests that sisters can occasionally  
271 diverge in their migratory paths yet adopt a similar cardiac fate; or adopt similar paths and  
272 contribute to different fates. (Fig.5 J-L and Figure 5 -supplementary 1 A-B). However, the  
273 majority of sister pairs with the same cardiac fate exhibited notably similar migratory  
274 trajectories (Fig .5 N-S). To rigorously assess this observation, we employed a permutation  
275 test. We created 100.000 permutations by pooling all log DTW distances and randomly  
276 assigning them to either unipotent or bipotent conditions. In each permutation, we computed  
277 the difference in average log DTW values between sister cells with shared fates and those  
278 with distinct fates. This iterative process generated a null distribution, allowing us to test  
279 whether unipotent progenitors are producing sisters with more similar trajectories compared  
280 to bipotent progeny (Fig.5 Supplementary Figure 1C). Our analysis revealed that this was the  
281 case (p-value= 0.00027). Plotting the DTW values over time shows that the migratory  
282 trajectories of sister cells sharing the same fates are similar throughout their entire migratory  
283 periods and any observed similarity is not attributed to systematic smaller DTW-  
284 contributions towards the end of the trajectory (Fig.5 M). Moreover, the DTW values  
285 diverged early in sister cells with distinct fates, indicating that their migratory trajectories are  
286 rapidly distinct at the beginning of their migration when the different fates head off towards  
287 different destinations (Fig.5 M). The results suggest that pairs of sisters with shared fate  
288 maintain closer proximity throughout their entire migration periods, exhibiting more

289 analogous migratory paths compared to sister cells that adopt distinct fates (Fig.5 M and N-  
290 S).

## 291 **Discussion**

292 Our findings illustrate the progression of cardiac mesodermal lineages during gastrulation  
293 (Fig.6). Using live-imaging and single cell tracking, we reconstructed cardiac mesodermal  
294 lineages and migratory paths of the cells over extended periods encompassing gastrulation  
295 and heart tube morphogenesis (~35 hours). Culturing embryos in large volumes of media  
296 culture (~1ml) using an open top light sheet microscope was critical to achieve these  
297 experiments.

298 Our live-imaging suggests that the cardiac crescent (or first heart field -FHF- and juxta-  
299 cardiac field partially overlapping the FHF) [25-28], are predominantly destined to contribute  
300 to the LV/AVC. In contrast, the atria arise at different times during gastrulation [1, 2, 7-9].  
301 These findings suggest that an early segregation of the ventricular and atrial cells has been  
302 conserved during evolution; an early segregation of these progenitor populations was  
303 previously shown at single cell resolution in the zebrafish [29-32]. They also align with *in*  
304 *vitro* differentiation experiments demonstrating that modulating pathways known to induce  
305 mesoderm can generate molecularly distinct mesoderm favouring the generation of  
306 ventricular or atrial-like cardiomyocytes respectively [33-37].

307 We found that the early proximal mesoderm harbours multipotent progenitors generating  
308 extraembryonic mesoderm, pericardial, endocardial and endothelial-like cells in addition to  
309 LV/AVC myocytes. These progenitors became rapidly restricted into unique cardiac fates  
310 during migration - prior to the establishment of the cardiac crescent and onset of myocyte

311 differentiation. The observation of short-lived multipotent cardiac progenitors is consistent  
312 with clonal analysis results of *Hand1*<sup>+</sup> and *Mesp1*<sup>+</sup> mesodermal progenitors [1-3].

313 Previous migration analysis noted opposing cell density and motility gradients in the  
314 mesoderm [6]. According to this model, cells continually exchange neighbours and disperse  
315 widely until their movements gradually diminish, eventually settling in positions and fates as  
316 gastrulation concludes. Our live-imaging analysis builds upon these findings, offering a more  
317 detailed and prolonged evaluation of the migratory paths of cells in relation to their future  
318 fates. The analysis revealed that progenitors contributing to LV/AVC and atrial myocytes  
319 remain as separated cell populations throughout migration, establishing two distinct  
320 progenitor domains in the heart tube without mixing. During ontogeny, the pericardial and  
321 myocardial layers, along with the subjacent plexus of elongated endocardial cells, emerge in  
322 close proximity within the cardiac crescent [38]. The migratory trajectories of progeny  
323 contributing to these three distinct cardiac fates were more deterministic than previously  
324 recognised. Sister cells contributing to the same fate tended to exhibit similar migratory  
325 paths. In the future, it will be crucial to discern whether early mesodermal progenitors exhibit  
326 similar migratory paths because of similarities in their initial internal state and their ability to  
327 interpret environmental cues in a cell-specific manner.

328 Previous studies in zebrafish indicated that G-protein-coupled receptor signalling, a hallmark  
329 of chemokine signalling, regulates heart progenitor movements during gastrulation [39-41].  
330 Moreover, BMP, Nodal, and FGF morphogen gradients regulate cell migration independently  
331 of cell fate [42-46]. Thus, it seems that mesodermal cells respond to morphogen cues with  
332 precision, providing determinism to the morphogenetic cell behaviours. Simultaneously, they  
333 demonstrate plasticity regarding their final fate [47]. While progenitors are seen giving rise to  
334 only one cardiac cell type, they could potentially generate additional cardiac fates when no

335 longer constrain by positional cues. We propose that achieving a delicate balance between  
336 determinism and plasticity is essential to ensure robust morphogenesis. This balance enables  
337 cells to follow specific developmental pathways while also maintaining the flexibility needed  
338 to adapt to changing external cues.

339 Together, our live-imaging analysis of migration and cardiac lineages provide evidence that  
340 some regulation of directionality of cell movements and fate allocation may exist early within  
341 the mesoderm. The findings have broader implications for our understanding of  
342 organogenesis since they address how initial differences between progenitors and signalling  
343 cues may ultimately affect the fate and movements of cells.

## 344 **Material and Methods**

### 345 **Experimental model and subject details**

346 All animal procedures were performed in accordance with the Animal (Scientific Procedures)  
347 Act 1986 under the UK Home Office project licenses PP8527846 (Crick) and  
348 PP3483414 (UCL) and PIL IA66C8062.

349

### 350 **Mouse strains**

351 The  $T^{nEGFP-CreERT2/+}$  (MGI:5490031) and  $Foxa2^{nEGP-CreERT2/+}$  (MGI:5490029) lines were obtained from  
352 Hiroshi Sasaki. The  $R26^{Tomato Ai14/ Tomato Ai14}$  ( $Gt(ROSA)26Sor^{tm14(CAGtdTomato)Hze}$  (MGI:3809524), were  
353 obtained from the Jackson Laboratory. The  $(no\ gene)^{Tg(BRE:H2B;Turquoise)Jbri}$  BMP reporter line was  
354 generated by the Briscoe laboratory previously [7].

### 355 **Generation of the cTnnT-2a-eGFP line**



356 The C -terminal tagging of cardiac troponin cTnnt2 with eGFP was generated in the Genetic  
357 Modification Service using CRISPR-Cas9 strategy. This editing was performed by co-  
358 transfection of a Cas9-gRNA vector and a donor vector comprising the T2A self-cleaving  
359 peptide and eGFP into B6N 6.0 embryonic stem cells using Lipofectamine 2000. The donor  
360 vector contained a 786bp insert of T2A-eGFP with 1kb homology arms either side. The guide  
361 sequence used was 5'-TTTCATCTATTTCCAACGCC-3'. Two correctly targeted ESC  
362 clones were microinjected into blastocysts which were then transferred into the uterus of  
363 pseudo pregnant BRAL (C57BL/6 albino) females. Generated chimeras were crossed to  
364 BRAL and F0 chimera offspring were initially screened for the proper integration of T2A -  
365 eGFP by Sanger sequencing. The F0 were again crossed to BRAL to confirm germline  
366 transmission of the mutation and F1 mice were validated by Sanger sequencing.

### 367 **Immunostaining**

368 Embryos were dissected in 1x Phosphate buffered saline (PBS, Invitrogen), fixed for 4 hours  
369 in 4% PFA at room temperature, washed with 1x PBS-0.1% Triton (0.1% PBS-T) and  
370 permeabilised in 0.5% PBS-T. Embryos were blocked with 1% donkey serum for 1hr,  
371 incubated overnight at 4deg with antibodies diluted in 0.1% PBS-T: mouse anti-cTnnT  
372 (1:250, Thermo Fischer Scientific Systems, MS295P0). Embryos were washed in 0.1% PBS-  
373 T at room-temperature and incubated overnight at 4deg with secondary antibodies coupled to  
374 555 fluorophores (1:200, Molecular Probes). After washing with 0.1% PBS-T, embryos were  
375 then incubated overnight at 4deg with DAPI (1:1000). Embryos were washed in 0.1% PBS-T  
376 and mounted in vectashield. Confocal images were obtained on an inverted Sp5 confocal  
377 microscope with a 20X oil objective (for early E6.5-E7.5 embryos) or a 10X air objective  
378 (0.4 NA) (for E12.5 hearts) at a 2048 × 2048 pixels dimension with a z-step of 1 to 5 µm.

379 Embryos were systematically imaged throughout from top to bottom. Images were processed  
380 using Fiji software [48].

381

### 382 **Embryo culture**

383 Embryos were dissected at E6.5 in a solution of DMEM (Dulbecco's Modified Eagle  
384 Medium- D5921 Sigma-Aldrich) with 10% FBS (Fetal Bovine Serum- A5256701 Thermo  
385 Fisher), 25 mM HEPES-NaOH (pH 7.2), penicillin, and streptomycin. The dissection was  
386 done on a stereoscope microscope with a Tokai Hit thermoplate at 37 °C. Dissection was  
387 completing within 5 minutes and immediately transfer to media culture to preserve the  
388 embryo's developmental potential. Media culture was a mixture of 75% freshly prepared rat  
389 serum (filtered through a 0.2-mm filter) and 25% DMEM (containing 1 mg/ml D-glucose and  
390 pyruvate, without phenol red and L-glutamine- D5921 Sigma-Aldrich), supplemented with  
391 1× glutamax, 100 units/ml penicillin, 100 µg/ml streptomycin, and 11 mM HEPES. The rat  
392 serum was prepared according to established protocols [49, 50], stored at -80 °C, heat-  
393 inactivated at 56 °C for 30 minutes, and filtered through a 0.22-µm filter before use. All  
394 media were equilibrated with a mixture of 5% O<sub>2</sub>, 5% CO<sub>2</sub>, and 90% N<sub>2</sub>, and warmed to  
395 37 °C before adding embryos.

396

### 397 **Multiphoton microscopy**

398 To hold embryos in position during time-lapse acquisition, we made bespoke plastic holders  
399 with holes of different diameters (0.3 to 05 mm) to ensure a good fit for the ectoplacental  
400 cone similarly to the traps developed by Nonaka and colleagues [51]. Embryos were mounted  
401 with their anterior side facing up. To avoid evaporation, the medium was covered with  
402 mineral oil (Sigma-Aldrich; M8410). Before starting the time-lapse acquisition, embryos  
403 were precultured for at least 2 hours in the microscopy culture set up. For the acquisition, we

404 used the multiphoton Olympus FVMPE-RS equipped with a 5% CO<sub>2</sub> incubator and a heating  
405 chamber maintaining 37°C. The objective lens used was a HCX APO L 20x/1.00 W dipping  
406 objective, which allowed a 2-mm working distance for imaging mouse embryos. A  
407 SpectraPhysics MaiTai DeepSee pulsed laser was set at 880 nm and used for one-channel  
408 two-photon imaging. Image settings was: output power: 250 mW, pixel dwell time: 7 μs, line  
409 averaging: two and image dimension: 610 × 610 μm (1,024 × 1,024 pixels). The z step was 6  
410 μm.

411

### 412 **Light sheet microscopy**

413 For all light sheet acquisitions, we imaged *TnEGFP-CreERT2/+; R26 Tomato Ai14/ Tomato*  
414 *Ai14, cTnnT-2a-GFP+/-* embryos. Tamoxifen (T5648 SIGMA) was dissolved in corn oil.  
415 Oral gavage was performed (0.02 mg/body weight) at indicated embryonic stages. Embryos  
416 were dissected at least 12 hours after. Before the time-lapse acquisition, embryos were  
417 precultured for at least 2 hours in the microscopy culture set-up. To hold embryos in position  
418 during the acquisition, we embedded part of the ectoplacental cone in Matrigel growth factor  
419 reduced phenol red-free (Corning Cat. No 356231) diluted two times with culture medium in  
420 a dedicated open-top FEP sample chamber containing an array of four chambers. Typically, 1  
421 embryo was mounted per well, totalling 4 per experiment. Pixel size was 2 μm x 0.347 x  
422 0.347 (z, x, y). The Viventis LS1 used a single view and dual illumination light sheet.  
423 Detection was done using a Nikon 25X NA 1.1 water immersion objective with final 18.7X  
424 magnification generating a field of view of 800 x 800 μm. Illumination with the 488 and 561  
425 lasers was sequential. Image acquisition was performed every 2 mins and in stacks totalling  
426 500 μm. Exposure times for GFP and tdTomato detection was 50ms and 100ms. Light sheet  
427 thickness was 3.3 μm. Embryos were incubated at 37°C in 8% CO<sub>2</sub> with humidification  
428 throughout.

429

## 430 **Cell tracking**

431 The original images underwent conversion into HDF5/XML file formats and registration  
432 using BigSticher [14], following the methodology outlined in prior work [6]. Subsequently,  
433 these processed images were imported into the MaMuT Fiji plugins for manual cell tracking  
434 [5]. The MaMut viewer windows allowed visualization of each tracked cell at any brightness,  
435 scale, and rotation parameters. Cell identification is initiated at the initial time point, with  
436 manual tracking occurring every five-time points, except during mitosis. During mitosis,  
437 tracking was performed at every time-point to capture daughter cell separation accurately.  
438 The TrackScheme lineage browser was employed to visualize the reconstructed cell lineage  
439 tree. Tracked cells were depicted as nodes interconnected by edges, and cell divisions were  
440 illustrated as split branches. For subsequent analysis, the tracked cells' spots, tracks, cell  
441 division time and GFP intensities were exported in csv format.

442

## 443 **Threshold analysis**

444 GFP values were normalized based on the highest GFP value within each movie's tracking  
445 data. To discern GFP-positive cells from the background, we implemented the following  
446 approach: GFP background intensities were measured at regular intervals throughout each  
447 movie and linear interpolation was applied between time points to establish a background  
448 value for every time-point. The threshold for distinguishing GFP-positive and GFP-negative  
449 cells was determined by using a multiple of the mean background. The threshold was set to  
450 the lowest multiplier, ensuring that every endocardial cell in each movie were classified as  
451 GFP-negative.

452

## 453 **Lineage analysis**

454 Each reconstructed lineage tree starts with a mother cell. The mother divides giving rise to  
455 the two daughter cells D1 and D2. Then D1 divides giving rise to daughters D11 and D12.  
456 D11 divides giving rise to daughters D111 and D112. Lineage trees were generated in R  
457 version 4.3.2 using the 'ggtree' version 3.10.0 package [52] with Newick format and imported  
458 into R through the 'read.tree' function from the 'ape' package version 5.7.1. The branch  
459 lengths of the trees are proportional to the cell cycle length. The trees were coloured using the  
460 'scale\_colour\_gradient' function in the 'ggtree' package, which imparts a colour gradient  
461 based on the normalized GFP intensities of the cells or `paintsubtree` function in `phytools`  
462 version 2.03 package [53] in R version 4.3.2 (<https://www.R-project.org>).

463

#### 464 **Homotypic and Heterotypic Distances Calculation**

465 Trajectories were reconstructed in 3D using `matplotlib` version 3.7.2 package in Python  
466 3.11.53. We computed Euclidean distances to quantify the spatial relationships among cells,  
467 categorizing them into 'homotypic distances' when comparing cells of the same fate and  
468 'heterotypic distances' when comparing cells of different fates. Progenitors' coordinates were  
469 sampled before cTnnT-2a-eGFP signal was observed. We only considered branches lasting at  
470 least 4 hours into the cell cycle to allow sufficient cell migration. To analyse the evolution of  
471 homotypic and heterotypic distances over time, we focused on daughters' coordinates at three  
472 distinct time points: T0, T1, and T2. T0: 20 minutes after the mother's initial cell division.  
473 T1: last time point before the daughters' subsequent cell division. T2: final time point at  
474 which all granddaughter cells exist. If no third generation is present, we only considered  
475 branches lasting at least 4 hours into the cell cycle to allow sufficient cell migration.

#### 476 **Midpoint Calculations**

477 The midpoints between D1's and D2's progeny were first determined by averaging their  
478 coordinates. Progenitors' coordinates were sampled before cTnnT-2a-eGFP signal was  
479 observed. Subsequently, a midpoint distance between D1 and D2's progeny's midpoints was  
480 calculated.

#### 481 **Dynamic time warping (DTW)**

482 We analyzed migratory trajectories within cardiac lineages by comparing the paths of sister  
483 cells from the time immediately following the division of their mother cell to the final time  
484 point before the first sister cell division. Trajectory similarity was assessed using the 'dtw-  
485 python' (version 1.3.0) Python package, measuring the dynamic time warping distance  
486 (DTW) between the cells. We opted for DTW distance over Euclidean distance, as DTW  
487 accommodates cells with spatially similar yet temporally nonsynchronous trajectories [52,  
488 53]. We applied the 'symmetricP1' step pattern, a slope-constrained step pattern [22, 23]. To  
489 determine whether DTW distances between sister cells, whether sharing the same fate or  
490 having distinct fates, exhibited significant differences, we performed a permutation test using  
491 the 'scipy' Python package (Version 1.11.1) [54]. This involved 100,000 resamplings and the  
492 calculation of differences between log mean DTW distances for unipotent and bipotent cells  
493 in each permutation. The resulting p-value was computed as the proportion of permuted  
494 values greater than or equal to the observed values + 1, divided by the total number of  
495 permutations + 1. Our null hypothesis assumed no difference in log mean DTW distances  
496 between sister cells generated by unipotent and bipotent progenitors, while the alternative  
497 hypothesis suggested a significant difference.

## 498 **Figure Legends**

### 499 **Figure 1. Development and Characterisation of the cTnnT-2a-GFP line. (A)** Schematics

500 illustration of a CRISPR-cas9-mediated strategy to insert a 2a-GFP cassette in front of the

501 stop codon into the cTnnT2 gene. **(B-C)** Representative immunofluorescence staining for

502 cTnnT2 in hearts at different stages in cTnnT-2a-GFP mice. Scale bar at E8: 100  $\mu$ m. Scale

503 bar at E12.5: 200  $\mu$ m **(D)** Image sequence from time-lapse video of an *TnGPF-CreERT2/+;*

504 *Bre:H2B-Turquoise; cTnnT-2a-GFP* embryo. Scale bar: 100  $\mu$ m. IF: Inflows, HT: heart tube,

505 OFT: outflow tract, LV: left ventricle, RV: right ventricle, RA: right atria, LA: left atria, YS:

506 Yolk Sac, Ant: Anterior, Post: posterior,

### 507 **Figure 2. Long-term live-imaging from gastrulation to heart tube formation.**

508 **(A)** Schematic of the cell tracking procedure. Tracks carry information on (i) reporter

509 expression, (ii) lineage relationships and (iii) trajectories. **(B)** Image sequences from three

510 time-lapse videos of *TnGPF-CreERT2/+; R26tdtomato+/-; cTnnT-2a-GFP* embryos

511 resulting from the administration of tamoxifen (0.02mg/body weight) at indicated times.

512 LV/AVC: left ventricle and atrio ventricular canal. Scale bar: 100  $\mu$ m

### 513 **Figure 3. Independent LV/AVC and Atria progenitors contribute to distinct regions of**

514 **the heart tube. (A)** Reconstruction of mesodermal cell lineages. Cell types are indicated at

515 the endpoints. Lineages are coloured according to their normalised GFP intensities. **(B)** Only

516 the progenitors contributing to at least one cTnnT-2a-GFP+ progenitors are represented. (i)

517 Fate map depicting early (green) and late (magenta) mesoderm contributing to distinct

518 regions of the heart tube (ii) Each colour represents a distinct clone. (iii) cTnnT-2a-GFP+

519 cells are shown in red. **(C)** Fate map showing all the early mesodermal progenitors coloured

520 coded by fate. **(D)** Birth date of progenitors contributing to cTnnT-2a-GFP+ LV/AVC and

521 cTnnT-2a-GFP+ Atria myocytes. The cells already present at the beginning of the movie are  
522 highlighted in a grey-dotted box. **(E)** Timepoints at which LV/AVC and atrial progenitors'  
523 GFP intensities are above a certain threshold value and defined as GFP-positive cells  
524 (Material and Methods) For LV/AVC progenitors, the mean differentiation time is 19.0 hours  
525 +/-2.2 and for atrial progenitors it is 30.2 hours +/-2.4; mean +/- SD. **(F)** Time between the  
526 first and last progenitor to become cTnnT-2a-GFP+ in every lineage tree contributing to  
527 myocytes. Mean time for LV/AVC is 2.5 hours +/-1.7 (SD) and 2.3 hours +/-2.6 -SD), p=  
528 0.44. The statistical analysis was done using a Mann-Whitney test. **(G)** Birth date of  
529 unipotent progenitors for LV/AVC and atrial myocytes, endocardium and pericardium. The  
530 cells already present at the beginning of the movie are highlighted in a grey-dotted box. **(H-**  
531 **I)** Image sequences from time-lapse video of *TnGPF-CreERT2/+; R26tdtomato+/-; cTnnT-*  
532 *2a-GFP* embryos depicting an LV/AVC (H) and Atrial (I) progenitors. The corresponding  
533 lineage tree coloured by the normalised GFP intensity of the track cells are shown in H' and  
534 I'. Arrows point to the cells in the lineage tree in H' and I'. Scale bar: 100  $\mu$ m

535 **Figure 4. Lineage analysis in time-lapse movies demonstrates unipotent and bipotent**  
536 **mesodermal progenitors exist.** **(A-C and E)** Image sequences from time-lapse videos  
537 of *TnGPF-CreERT2/+; R26tdtomato+/-; cTnnT-2a-GFP* embryos depicting an unipotent  
538 pericardium (A) and an Endocardial and Extra-embryonic mesoderm (B), an endocardial and  
539 myocyte (C) and endothelial-like and Extra-embryonic bipotent progenitors (E). The  
540 corresponding lineage tree coloured by the normalised GFP intensity of the track cell are  
541 shown in A'-C' and E'. Arrows point to the cells represented in the lineage tree in A'-C' and  
542 E'. **(D)** Image sequences from time-lapse videos of *TnGPF-CreERT2/+; R26tdtomato+/-;*  
543 *cTnnT-2a-GFP* embryos depicting an endocardial progenitor migrating inside the forming  
544 heart tube. Scale bar: 100  $\mu$ m



545 **Figure 5. Cell migration analysis in lineages reveals hidden patterns. (A)** Dispersion  
546 analysis over time shows the distances between all daughters and granddaughters in all the  
547 cardiac lineages at time points T0, T1, and T2, as explained in the results and material  
548 method sections. The average distances at T0 (n=28), T1 (n=28) and T2 (n=136) are 15.2  $\mu\text{m}$   
549 +/- 3.1; 39.08  $\mu\text{m}$  +/- 46.26 and 60.25  $\mu\text{m}$  +/- 67.75, mean +/- SD; T0 vs T1, p=0.027; T1 vs  
550 T2, p=0.040. Results were statistically analysed using an uncorrected Dunn's test following a  
551 Kruskal-Wallis test (P<0.001). **(B)** Schematic diagram of the hypothesis. If cells migrate  
552 randomly, then the unipotent and bipotent progeny will generate equally dispersed daughters  
553 by the end of the migration. Alternatively, unipotent progeny will generate less dispersed  
554 daughter cells if heterogeneity in migratory trajectories exist. Midpoint distance depicts the  
555 Euclidian distance between the D1's daughters' midpoint and the D2's daughters' midpoint.  
556 Homotypic and heterotypic distances are between cells of the same or different fate. **(C)**  
557 Dispersion analysis comparing homotypic and heterotypic distances between all daughters  
558 and granddaughters in all the cardiac lineages at time points T0, T1, and T2. The average  
559 homotypic distances at T0 (n=20), T1 (n=20) and T2 (n=105) are 14.45  $\mu\text{m}$  +/- 3.1, 24.67  $\mu\text{m}$   
560 +/-11.69 and 32.90  $\mu\text{m}$  +/- 19.75, mean +/- SD. The average heterotypic distances at T0  
561 (n=11), T1 (n=11) and T2 (n=37) are 16.11  $\mu\text{m}$  +/-2.86, 63.40  $\mu\text{m}$  +/- 67.13 and 104.4  $\mu\text{m}$  +/-  
562 89.49, mean +/- SD. Results were statistically analysed using an uncorrected Dunn's test  
563 following a Kruskal-Wallis test (P<0.001). Timepoint 0: 9 hours and 40 minutes on average  
564 +/- 7.4; Timepoint 1: 17 hours and 30 minutes on average +/- 8.4; Timepoint 2: 22 hours and  
565 43 minutes on average +/- 6; +/- SD). **(D)** Dispersion analysis comparing homotypic and  
566 heterotypic distances between all daughters and granddaughters for all the cardiac lineages.  
567 Coordinates were sampled before the onset of cTnnT-2a-GFP expression in the embryos. The  
568 average homotypic and heterotypic distances are 34.82  $\mu\text{m}$  +/-20.38 (n=110) and 137.2  $\mu\text{m}$   
569 +/-118.4 (n=70); mean +/- SD. Results were statistically analysed using a Mann-Whitney

570 test. Timepoints on average were 22 hours +/- 5, +/-SD **(E-F)** Homotypic distances in all  
571 lineages generating at least one cTnnT-2a-GFP+ LV/AVC (E) or cTnnT-2a-GFP+ atria (F)  
572 myocytes. **(G)** Homotypic distances per fate and in lineages developing in only one fate.  
573 Coordinates were sampled before the onset of cTnnT-2a-GFP expression in the embryos. The  
574 average homotypic distances for LV/AVC, Atria, Pericardium, Endocardium and ExMeso  
575 fates were 33.37  $\mu\text{m}$  +/-20.89 (n=90), 27.30  $\mu\text{m}$  +/- 29.40 (n=34), 36.67  $\mu\text{m}$  +/- 15.14 (n=24),  
576 41.66  $\mu\text{m}$  +/- 21.31 (n=18) and 79.09  $\mu\text{m}$  +/- 94.06 (n=38), mean +/- SD. Results were  
577 statistically analysed using a Kruskal-Wallis and Dunn's multiple comparisons tests. **(H)**  
578 Midpoint analysis comparing distances between D1 and D2's daughters' midpoints in cases  
579 where D1 and D2 generate the same fate (unipotent) or different fates (bipotent). Analysis  
580 was done for all the cardiac lineages. Coordinates were sampled before the onset of cTnnT-  
581 2a-GFP expression in the embryos. The average midpoints distances for unipotent and  
582 bipotent progenitors were 32.89  $\mu\text{m}$  +/-20.03 (n=20) and 97.35  $\mu\text{m}$  +/-88.49 (n=16), mean +/-  
583 SD. **(I)** Dynamic time warping allows quantifying similarities between two migration  
584 paths. **(J)** Dynamic time warping score comparing D1 and D2 cell tracks up to their next cell  
585 division in cases where D1 and D2 have the same cardiac fate (unipotent) or distinct fates  
586 (bipotent). Results were statistically analysed using a Mann-Whitney test. **(K-L)** log DTW  
587 score for all lineages generating only cTnnT-2a-GFP+ LV/AVC (K) or cTnnT-2a-GFP+ atria  
588 (L) myocytes. **(M)** Average DTW values over time for D1 and D2 daughters generated by  
589 unipotent (red) and bipotent (bleu) progenitors. Shaded blue and red represent the standard  
590 error. At step 7 (indicated by an orange arrow), the DTW values for daughters of shared and  
591 distinct fates are statistically distinct. Results were statistically analysed using a Mann-  
592 Whitney test. **(N-S)** Examples of trajectories and corresponding midpoint distance calculation  
593 (O'-T') and lineage trees (O''-T''). The red lines in lineage trees indicate the time points at

594 which the cells' coordinates were sampled for the midpoint analysis. The red lines in the  
595 trajectory diagram represents the distances between D1 and D2's daughters' midpoints.

596 **Figure 6. Working Model of early cardiac development.** (A) Early proximal mesodermal  
597 cells are initially highly plastic (or multi-potent) but rapidly become committed to specific  
598 cardiac fates as they initiate migration towards specific embryonic regions in response to  
599 environmental cues. LV/AVC and Atrial progenitors are generated from early and late  
600 mesoderm, respectively. LV/AVC progenitors differentiate first into myocytes and establish  
601 the cardiac crescent. Atria progenitors differentiate later and generate the heart tube's  
602 inflows. (B) Pair of sisters sharing the same fate have more identical migration paths than  
603 sisters with distinct fates. PS: primitive streak. LV/AVC: left ventricle/atrioventricular canal.  
604 ExM: Extra-embryonic mesoderm.

605 **Figure 2-supplementary figure 1. Tamoxifen induces tdTomato expression in *TnGPF-***  
606 ***CreERT2/+; R26tdtomato+/-; cTnnT-2a-GFP* embryos at the correct embryonic stages.**

607 (A) Image sequence *TnGPF-CreERT2/+; R26tdtomato+/-; cTnnT-2a-GFP* embryos resulting  
608 from the administration of tamoxifen (0.02mg/bw) at E5.5, and culture from E6 to E7 in the  
609 absence of tamoxifen. Arrows point to tdTomato-positive cells present in the Extra-  
610 embryonic mesoderm. PS: primitive streak. Scale bar: 100  $\mu$ m

611 **Figure 2-supplementary figure 2. GFP signal Quantification. (A, D and G)**

612 Quantification of the cTnnT-2a-GFP signal in the cardiac crescent and inflows over time. (B-  
613 C, E-J, H-F) We quantified cTnnT-2a-GFP expression by drawing "circles" in the cardiac  
614 crescent (B, E and H) and inflows (C, J and F) at different time points. We synchronised the  
615 three movies according to their onset of cTnnT-2a-GFP expression in the initial cardiac  
616 crescent and subsequent heart tube inflows generated during morphogenesis.

617 **Figure 2-supplementary figure 3. Threshold analysis (A-C)** Green lines represent the  
618 threshold set to discern GFP-positive cells from the background. **(D)** Red round circles  
619 represent the areas in which the background GFP intensity was measured.

620 **Figure 3-supplementary figure 1. Independent progenitors contribute to the LV/AVC**  
621 **and Atria. (A)** Only the progenitors contributing to at least one cTnnT-2a-GFP+ progenitors  
622 are represented. In i-iii is movie 2 and in iv-xi is movie 3. (i and iv) Fate map depicting early  
623 (green) and late (magenta) mesoderm contributing to distinct regions of the heart tube. (ii and  
624 v) Each colour represents a distinct clone. (iii and vi) cTnnT-2a-GFP+ cells are shown in red.  
625 Scale bar: 100  $\mu$ m

626 **Figure 4-supplementary figure 1. Tripotent mesodermal progenitors exist. (A)** Image  
627 sequences from time-lapse video of *TnGPF-CreERT2/+; R26tdtomato+/-; cTnnT-2a-*  
628 *GFP* embryos depicting a progenitor contributing to three cell types. The corresponding  
629 lineage tree coloured by the normalised GFP intensity of the track cells are shown in A'.  
630 Arrows point to the cells represented in the lineage tree in A'. Scale bar: 100  $\mu$ m

631 **Figure 5-supplementary figure 1. Cardiac progenitor trajectories analysis. (A-B)**  
632 Examples of trajectories and corresponding midpoint distance calculation (A'-A') and lineage  
633 trees (A''-B'''). The red lines in lineage trees indicate the time points at which the cells'  
634 coordinates were sampled for the midpoint analysis. The red lines in the trajectory diagram  
635 represents the distances between D1 and D2 daughters' midpoints. **(C)** Histogram showing  
636 the distribution of the permuted tests obtained by calculating the log mean difference  
637 between randomly shuffled unipotent and bipotent dynamic time warping (DTW) distances.  
638 The data were binned at 30 $\mu$ m intervals. A red dashed line marks the observed log mean  
639 difference.

640 **Video 1-3:** Live-imaging from gastrulation to heart tube stage. Embryos are  $Tn^{GPF-CreERT2/+}$  ;  
641  $R26^{tdTomato/+}$ ; cTnnT-2a-GFP. Pregnant mice received tamoxifen at around E6 (Videos 1-2)  
642 and E6.5 (Video 3). Images are Maximum projection of 250 sections acquired every 2  $\mu$ m.  
643 Interval between frames: 2 minutes. Related to Fig.2 B.

644 **Video 4:** Example of a myocyte progenitor visualised along the xy and yz axis. From video 2.  
645 Scale bar: 50  $\mu$ m.

646 **Video 5:** Example of an endocardial progenitor visualised along the xy and yz axis. From  
647 video 1. Scale bar: 50  $\mu$ m.

648 **Video 6:** Example of a pericardial progenitor visualised along the xy and yz axis. From video  
649 3. Scale bar: 50  $\mu$ m.

## 650 **Acknowledgments**

651 We thank Dr Martin Dominguez for their initial help with BigSticher and MaMut. We thank  
652 Dr Rosie Marshall and Prof. Andrew Copp for their help with rat serum preparation. We also  
653 thank the Light Microscopy facilities and Biological Research Facilities at the Francis Crick  
654 Institute and UCL for their help with imaging, image analysis and transgenic colonies. We  
655 thank Drs Nancy Stathopoulou and Florencia Cavodeassi for comments on the manuscript.  
656 We thank all members of the Ivanovitch and Alexandre labs for help, advice, reagents, and  
657 feedback.

## 658 **Author Contribution**

659 S.A. Conceptualization, Formal analysis, Investigation, Visualization, Writing – review &  
660 editing, P.A.E. Methodology, Writing – review & editing, A.C. Methodology, Writing –  
661 review & editing, S.V.B. Methodology, J.A.D. Methodology, Supervision, Writing – review

662 & editing, J.B. Funding acquisition, Supervision, Writing – review & editing, K.I. Funding  
663 acquisition, Project Administration, Conceptualization, Formal analysis, Investigation,  
664 Visualization, Supervision, Writing – original draft, Writing – review & editing.

## 665 **Funding**

666 This work was funded by BHF (FS/IBSRF/21/25085) to K.I. S.A. received a 4-year BHF  
667 PhD Studentships (FS/4yPhD/F/22/34181). P.A.E. and J.A.D. were supported by the  
668 Radiation Research Unit at the Cancer Research UK City of London Centre Award  
669 [C7893/A28990]. This work was also supported by the Francis Crick Institute, which  
670 receives its core funding from Cancer Research UK, the UK Medical Research Council and  
671 Wellcome Trust (all under FC001051) to J.B. Research infrastructure within the Institute of  
672 Child Health, UCL is supported by the NIHR Great Ormond Street Hospital Biomedical  
673 Research Centre. The views expressed are those of the authors and not necessarily those of  
674 the NHS, the NIHR or the Department of Health.

## 675 **Data Availability**

676 All relevant data are within the paper and its Supporting Information files.

## 677 **Competing interests**

678 The authors have declared that no competing interests exist.

## 679 **References**

- 680 1. Zhang Q, Carlin D, Zhu F, Cattaneo P, Ideker T, Evans SM, et al. Unveiling  
681 Complexity and Multipotentiality of Early Heart Fields. *Circ Res.* 2021;129(4):474-87. Epub  
682 20210624. doi: 10.1161/CIRCRESAHA.121.318943. PubMed PMID: 34162224; PubMed  
683 Central PMCID: PMCPMC9308985.
- 684 2. Lescroart F, Chabab S, Lin X, Rulands S, Paulissen C, Rodolosse A, et al. Early  
685 lineage restriction in temporally distinct populations of *Mesp1* progenitors during mammalian  
686 heart development. *Nat Cell Biol.* 2014;16(9):829-40. Epub 20140824. doi:  
687 10.1038/ncb3024. PubMed PMID: 25150979; PubMed Central PMCID: PMCPMC6984965.
- 688 3. Devine WP, Wythe JD, George M, Koshiba-Takeuchi K, Bruneau BG. Early  
689 patterning and specification of cardiac progenitors in gastrulating mesoderm. *Elife.* 2014;3.  
690 Epub 20141008. doi: 10.7554/eLife.03848. PubMed PMID: 25296024; PubMed Central  
691 PMCID: PMCPMC4356145.
- 692 4. Cohen-Gould L, Mikawa T. The fate diversity of mesodermal cells within the heart  
693 field during chicken early embryogenesis. *Dev Biol.* 1996;177(1):265-73. doi:  
694 10.1006/dbio.1996.0161. PubMed PMID: 8660893.
- 695 5. Wolff C, Tinevez JY, Pietzsch T, Stamatakis E, Harich B, Guignard L, et al. Multi-  
696 view light-sheet imaging and tracking with the MaMuT software reveals the cell lineage of a  
697 direct developing arthropod limb. *Elife.* 2018;7. Epub 20180329. doi: 10.7554/eLife.34410.  
698 PubMed PMID: 29595475; PubMed Central PMCID: PMCPMC5929908.
- 699 6. Dominguez MH, Krup AL, Muncie JM, Bruneau BG. Graded mesoderm assembly  
700 governs cell fate and morphogenesis of the early mammalian heart. *Cell.* 2023;186(3):479-96  
701 e23. doi: 10.1016/j.cell.2023.01.001. PubMed PMID: 36736300; PubMed Central PMCID:  
702 PMCPMC10091855.
- 703 7. Ivanovitch K, Soro-Barrio P, Chakravarty P, Jones RA, Bell DM, Mousavy Gharavy  
704 SN, et al. Ventricular, atrial, and outflow tract heart progenitors arise from spatially and  
705 molecularly distinct regions of the primitive streak. *PLoS Biol.* 2021;19(5):e3001200. Epub  
706 20210517. doi: 10.1371/journal.pbio.3001200. PubMed PMID: 33999917; PubMed Central  
707 PMCID: PMCPMC8158918.
- 708 8. Bardot E, Calderon D, Santoriello F, Han S, Cheung K, Jadhav B, et al. *Foxa2*  
709 identifies a cardiac progenitor population with ventricular differentiation potential. *Nat*  
710 *Commun.* 2017;8:14428. Epub 20170214. doi: 10.1038/ncomms14428. PubMed PMID:  
711 28195173; PubMed Central PMCID: PMCPMC5316866.
- 712 9. Gonzalez DM, Schrode N, Ebrahim TAM, Broguiere N, Rossi G, Drakhlis L, et al.  
713 Dissecting mechanisms of chamber-specific cardiac differentiation and its perturbation  
714 following retinoic acid exposure. *Development.* 2022;149(13). Epub 20220708. doi:  
715 10.1242/dev.200557. PubMed PMID: 35686629; PubMed Central PMCID:  
716 PMCPMC9340554.

- 717 10. Saykali B, Mathiah N, Nahaboo W, Racu ML, Hammou L, Defrance M, et al. Distinct  
718 mesoderm migration phenotypes in extra-embryonic and embryonic regions of the early  
719 mouse embryo. *Elife*. 2019;8. Epub 20190405. doi: 10.7554/eLife.42434. PubMed PMID:  
720 30950395; PubMed Central PMCID: PMC6450669.
- 721 11. Christiaen L, Davidson B, Kawashima T, Powell W, Nolla H, Vranizan K, et al. The  
722 transcription/migration interface in heart precursors of *Ciona intestinalis*. *Science*.  
723 2008;320(5881):1349-52. doi: 10.1126/science.1158170. PubMed PMID: 18535245.
- 724 12. Szymczak AL, Workman CJ, Wang Y, Vignali KM, Dilioglou S, Vanin EF, et al.  
725 Correction of multi-gene deficiency in vivo using a single 'self-cleaving' 2A peptide-based  
726 retroviral vector. *Nat Biotechnol*. 2004;22(5):589-94. Epub 20040404. doi: 10.1038/nbt957.  
727 PubMed PMID: 15064769.
- 728 13. Ivanovitch K, Temino S, Torres M. Live imaging of heart tube development in mouse  
729 reveals alternating phases of cardiac differentiation and morphogenesis. *Elife*. 2017;6. Epub  
730 20171205. doi: 10.7554/eLife.30668. PubMed PMID: 29202929; PubMed Central PMCID:  
731 PMC5731822.
- 732 14. Horl D, Rojas Rusak F, Preusser F, Tillberg P, Randel N, Chhetri RK, et al.  
733 BigStitcher: reconstructing high-resolution image datasets of cleared and expanded samples.  
734 *Nat Methods*. 2019;16(9):870-4. Epub 20190805. doi: 10.1038/s41592-019-0501-0. PubMed  
735 PMID: 31384047.
- 736 15. Malin-Mayor C, Hirsch P, Guignard L, McDole K, Wan Y, Lemon WC, et al.  
737 Automated reconstruction of whole-embryo cell lineages by learning from sparse  
738 annotations. *Nat Biotechnol*. 2023;41(1):44-9. Epub 20220905. doi: 10.1038/s41587-022-  
739 01427-7. PubMed PMID: 36065022; PubMed Central PMCID: PMC6450669.
- 740 16. Sugawara K, Cevrim C, Averof M. Tracking cell lineages in 3D by incremental deep  
741 learning. *Elife*. 2022;11. Epub 20220106. doi: 10.7554/eLife.69380. PubMed PMID:  
742 34989675; PubMed Central PMCID: PMC8741210.
- 743 17. Moorman A, Webb S, Brown NA, Lamers W, Anderson RH. Development of the  
744 heart: (1) formation of the cardiac chambers and arterial trunks. *Heart*. 2003;89(7):806-14.  
745 doi: 10.1136/heart.89.7.806. PubMed PMID: 12807866; PubMed Central PMCID:  
746 PMC1767747.
- 747 18. Wei Y, Mikawa T. Fate diversity of primitive streak cells during heart field formation  
748 in ovo. *Dev Dyn*. 2000;219(4):505-13. doi: 10.1002/1097-0177(2000)9999:9999<::AID-  
749 DVDY1076>3.0.CO;2-6. PubMed PMID: 11084650.
- 750 19. Kelly RG, Brown NA, Buckingham ME. The arterial pole of the mouse heart forms  
751 from Fgf10-expressing cells in pharyngeal mesoderm. *Dev Cell*. 2001;1(3):435-40. doi:  
752 10.1016/s1534-5807(01)00040-5. PubMed PMID: 11702954.
- 753 20. Mjaatvedt CH, Nakaoka T, Moreno-Rodriguez R, Norris RA, Kern MJ, Eisenberg  
754 CA, et al. The outflow tract of the heart is recruited from a novel heart-forming field. *Dev*  
755 *Biol*. 2001;238(1):97-109. doi: 10.1006/dbio.2001.0409. PubMed PMID: 11783996.



- 756 21. Waldo KL, Kumiski DH, Wallis KT, Stadt HA, Hutson MR, Platt DH, et al.  
757 Conotruncal myocardium arises from a secondary heart field. *Development*.  
758 2001;128(16):3179-88. doi: 10.1242/dev.128.16.3179. PubMed PMID: 11688566.
- 759 22. Zaffran S, Kelly RG, Meilhac SM, Buckingham ME, Brown NA. Right ventricular  
760 myocardium derives from the anterior heart field. *Circ Res*. 2004;95(3):261-8. Epub  
761 20040624. doi: 10.1161/01.RES.0000136815.73623.BE. PubMed PMID: 15217909.
- 762 23. Sakoe H, Chiba S. Dynamic-Programming Algorithm Optimization for Spoken Word  
763 Recognition. *Ieee T Acoust Speech*. 1978;26(1):43-9. doi: Doi 10.1109/Tassp.1978.1163055.  
764 PubMed PMID: WOS:A1978EN09300006.
- 765 24. Shokoohi-Yekta M, Hu B, Jin H, Wang J, Keogh E. Generalizing DTW to the multi-  
766 dimensional case requires an adaptive approach. *Data Min Knowl Discov*. 2017;31(1):1-31.  
767 Epub 20160215. doi: 10.1007/s10618-016-0455-0. PubMed PMID: 29104448; PubMed  
768 Central PMCID: PMC5668684.
- 769 25. Liang X, Wang G, Lin L, Lowe J, Zhang Q, Bu L, et al. HCN4 dynamically marks the  
770 first heart field and conduction system precursors. *Circ Res*. 2013;113(4):399-407. Epub  
771 20130606. doi: 10.1161/CIRCRESAHA.113.301588. PubMed PMID: 23743334; PubMed  
772 Central PMCID: PMC4017870.
- 773 26. Spater D, Abramczuk MK, Buac K, Zangi L, Stachel MW, Clarke J, et al. A HCN4+  
774 cardiomyogenic progenitor derived from the first heart field and human pluripotent stem  
775 cells. *Nat Cell Biol*. 2013;15(9):1098-106. Epub 20130825. doi: 10.1038/ncb2824. PubMed  
776 PMID: 23974038.
- 777 27. Tyser RCV, Ibarra-Soria X, McDole K, Arcot Jayaram S, Godwin J, van den Brand  
778 TAH, et al. Characterization of a common progenitor pool of the epicardium and  
779 myocardium. *Science*. 2021;371(6533). Epub 20210107. doi: 10.1126/science.abb2986.  
780 PubMed PMID: 33414188.
- 781 28. Watanabe Y, Wang Y, Tanaka Y, Iwase A, Kawamura T, Saga Y, et al. Hey2  
782 enhancer activity defines unipotent progenitors for left ventricular cardiomyocytes in juxta-  
783 cardiac field of early mouse embryo. *Proc Natl Acad Sci U S A*. 2023;120(37):e2307658120.  
784 Epub 20230905. doi: 10.1073/pnas.2307658120. PubMed PMID: 37669370; PubMed Central  
785 PMCID: PMC10500178.
- 786 29. Stainier DY, Lee RK, Fishman MC. Cardiovascular development in the zebrafish. I.  
787 Myocardial fate map and heart tube formation. *Development*. 1993;119(1):31-40. doi:  
788 10.1242/dev.119.1.31. PubMed PMID: 8275863.
- 789 30. Yutzey KE, Bader D. Diversification of cardiomyogenic cell lineages during early  
790 heart development. *Circ Res*. 1995;77(2):216-9. doi: 10.1161/01.res.77.2.216. PubMed  
791 PMID: 7614708.
- 792 31. Keegan BR, Meyer D, Yelon D. Organization of cardiac chamber progenitors in the  
793 zebrafish blastula. *Development*. 2004;131(13):3081-91. Epub 20040602. doi:  
794 10.1242/dev.01185. PubMed PMID: 15175246.

- 795 32. Garcia-Martinez V, Schoenwolf GC. Primitive-streak origin of the cardiovascular  
796 system in avian embryos. *Dev Biol.* 1993;159(2):706-19. doi: 10.1006/dbio.1993.1276.  
797 PubMed PMID: 8405690.
- 798 33. Dark N, Cosson MV, Tsansizi LI, Owen TJ, Ferraro E, Francis AJ, et al. Generation  
799 of left ventricle-like cardiomyocytes with improved structural, functional, and metabolic  
800 maturity from human pluripotent stem cells. *Cell Rep Methods.* 2023;3(4):100456. Epub  
801 20230424. doi: 10.1016/j.crmeth.2023.100456. PubMed PMID: 37159667; PubMed Central  
802 PMCID: PMCPMC10163040.
- 803 34. Mendjan S, Mascetti VL, Ortman D, Ortiz M, Karjosukarso DW, Ng Y, et al.  
804 NANOG and CDX2 pattern distinct subtypes of human mesoderm during exit from  
805 pluripotency. *Cell Stem Cell.* 2014;15(3):310-25. Epub 20140718. doi:  
806 10.1016/j.stem.2014.06.006. PubMed PMID: 25042702.
- 807 35. Lee JH, Protze SI, Laksman Z, Backx PH, Keller GM. Human Pluripotent Stem Cell-  
808 Derived Atrial and Ventricular Cardiomyocytes Develop from Distinct Mesoderm  
809 Populations. *Cell Stem Cell.* 2017;21(2):179-94 e4. doi: 10.1016/j.stem.2017.07.003.  
810 PubMed PMID: 28777944.
- 811 36. Schmidt C, Deyett A, Ilmer T, Haendeler S, Torres Caballero A, Novatchkova M, et  
812 al. Multi-chamber cardioids unravel human heart development and cardiac defects. *Cell.*  
813 2023. Epub 20231116. doi: 10.1016/j.cell.2023.10.030. PubMed PMID: 38029745.
- 814 37. Yang D, Gomez-Garcia J, Funakoshi S, Tran T, Fernandes I, Bader GD, et al.  
815 Modeling human multi-lineage heart field development with pluripotent stem cells. *Cell Stem*  
816 *Cell.* 2022;29(9):1382-401 e8. doi: 10.1016/j.stem.2022.08.007. PubMed PMID: 36055193.
- 817 38. DeRuiter MC, Poelmann RE, VanderPlas-de Vries I, Mentink MM, Gittenberger-de  
818 Groot AC. The development of the myocardium and endocardium in mouse embryos. *Fusion*  
819 *of two heart tubes?* *Anat Embryol (Berl).* 1992;185(5):461-73. doi: 10.1007/BF00174084.  
820 PubMed PMID: 1567022.
- 821 39. Zeng XX, Wilm TP, Sepich DS, Solnica-Krezel L. Apelin and its receptor control  
822 heart field formation during zebrafish gastrulation. *Dev Cell.* 2007;12(3):391-402. doi:  
823 10.1016/j.devcel.2007.01.011. PubMed PMID: 17336905.
- 824 40. Scott IC, Masri B, D'Amico LA, Jin SW, Jungblut B, Wehman AM, et al. The g  
825 protein-coupled receptor *agtr11b* regulates early development of myocardial progenitors. *Dev*  
826 *Cell.* 2007;12(3):403-13. doi: 10.1016/j.devcel.2007.01.012. PubMed PMID: 17336906.
- 827 41. Kupperman E, An S, Osborne N, Waldron S, Stainier DY. A sphingosine-1-phosphate  
828 receptor regulates cell migration during vertebrate heart development. *Nature.*  
829 2000;406(6792):192-5. doi: 10.1038/35018092. PubMed PMID: 10910360.
- 830 42. Ciruna B, Rossant J. FGF signaling regulates mesoderm cell fate specification and  
831 morphogenetic movement at the primitive streak. *Dev Cell.* 2001;1(1):37-49. doi:  
832 10.1016/s1534-5807(01)00017-x. PubMed PMID: 11703922.

- 833 43. Nutt SL, Dingwell KS, Holt CE, Amaya E. *Xenopus Sprouty2* inhibits FGF-mediated  
834 gastrulation movements but does not affect mesoderm induction and patterning. *Genes Dev.*  
835 2001;15(9):1152-66. doi: 10.1101/gad.191301. PubMed PMID: 11331610; PubMed Central  
836 PMCID: PMCPMC312687.
- 837 44. Yang X, Dormann D, Munsterberg AE, Weijer CJ. Cell movement patterns during  
838 gastrulation in the chick are controlled by positive and negative chemotaxis mediated by  
839 FGF4 and FGF8. *Dev Cell.* 2002;3(3):425-37. doi: 10.1016/s1534-5807(02)00256-3.  
840 PubMed PMID: 12361604.
- 841 45. von der Hardt S, Bakkens J, Inbal A, Carvalho L, Solnica-Krezel L, Heisenberg CP, et  
842 al. The Bmp gradient of the zebrafish gastrula guides migrating lateral cells by regulating  
843 cell-cell adhesion. *Curr Biol.* 2007;17(6):475-87. Epub 20070301. doi:  
844 10.1016/j.cub.2007.02.013. PubMed PMID: 17331724.
- 845 46. Guo Q, Li JY. Distinct functions of the major *Fgf8* spliceform, *Fgf8b*, before and  
846 during mouse gastrulation. *Development.* 2007;134(12):2251-60. Epub 20070516. doi:  
847 10.1242/dev.004929. PubMed PMID: 17507393; PubMed Central PMCID:  
848 PMCPMC2518685.
- 849 47. Tam PP, Parameswaran M, Kinder SJ, Weinberger RP. The allocation of epiblast cells  
850 to the embryonic heart and other mesodermal lineages: the role of ingression and tissue  
851 movement during gastrulation. *Development.* 1997;124(9):1631-42. doi:  
852 10.1242/dev.124.9.1631. PubMed PMID: 9165112.
- 853 48. Schindelin J, Arganda-Carreras I, Frise E, Kaynig V, Longair M, Pietzsch T, et al.  
854 Fiji: an open-source platform for biological-image analysis. *Nat Methods.* 2012;9(7):676-82.  
855 Epub 20120628. doi: 10.1038/nmeth.2019. PubMed PMID: 22743772; PubMed Central  
856 PMCID: PMCPMC3855844.
- 857 49. Cockroft DL, Brook FA, Copp AJ. Inositol deficiency increases the susceptibility to  
858 neural tube defects of genetically predisposed (curly tail) mouse embryos in vitro.  
859 *Teratology.* 1992;45(2):223-32. doi: 10.1002/tera.1420450216. PubMed PMID: 1615432.
- 860 50. Takahashi M, Makino S, Kikkawa T, Osumi N. Preparation of rat serum suitable for  
861 mammalian whole embryo culture. *J Vis Exp.* 2014;(90):e51969. Epub 20140803. doi:  
862 10.3791/51969. PubMed PMID: 25145996; PubMed Central PMCID: PMCPMC4672955.
- 863 51. Ichikawa T, Nakazato K, Keller PJ, Kajiura-Kobayashi H, Stelzer EH, Mochizuki A,  
864 et al. Live imaging and quantitative analysis of gastrulation in mouse embryos using light-  
865 sheet microscopy and 3D tracking tools. *Nat Protoc.* 2014;9(3):575-85. Epub 20140213. doi:  
866 10.1038/nprot.2014.035. PubMed PMID: 24525751.
- 867 52. Yu G. Using ggtree to Visualize Data on Tree-Like Structures. *Curr Protoc*  
868 *Bioinformatics.* 2020;69(1):e96. doi: 10.1002/cpbi.96. PubMed PMID: 32162851.
- 869 53. Revell LJ. phytools: an R package for phylogenetic comparative biology (and other  
870 things). *Methods Ecol Evol.* 2012;3(2):217-23. doi: 10.1111/j.2041-210X.2011.00169.x.  
871 PubMed PMID: WOS:000302538500001.

872 54. Virtanen P, Gommers R, Oliphant TE, Haberland M, Reddy T, Cournapeau D, et al.  
873 SciPy 1.0: fundamental algorithms for scientific computing in Python. *Nature Methods*.  
874 2020;17(3):261-72. doi: 10.1038/s41592-019-0686-2. PubMed PMID:  
875 WOS:000510821500001.

876

Figure 1

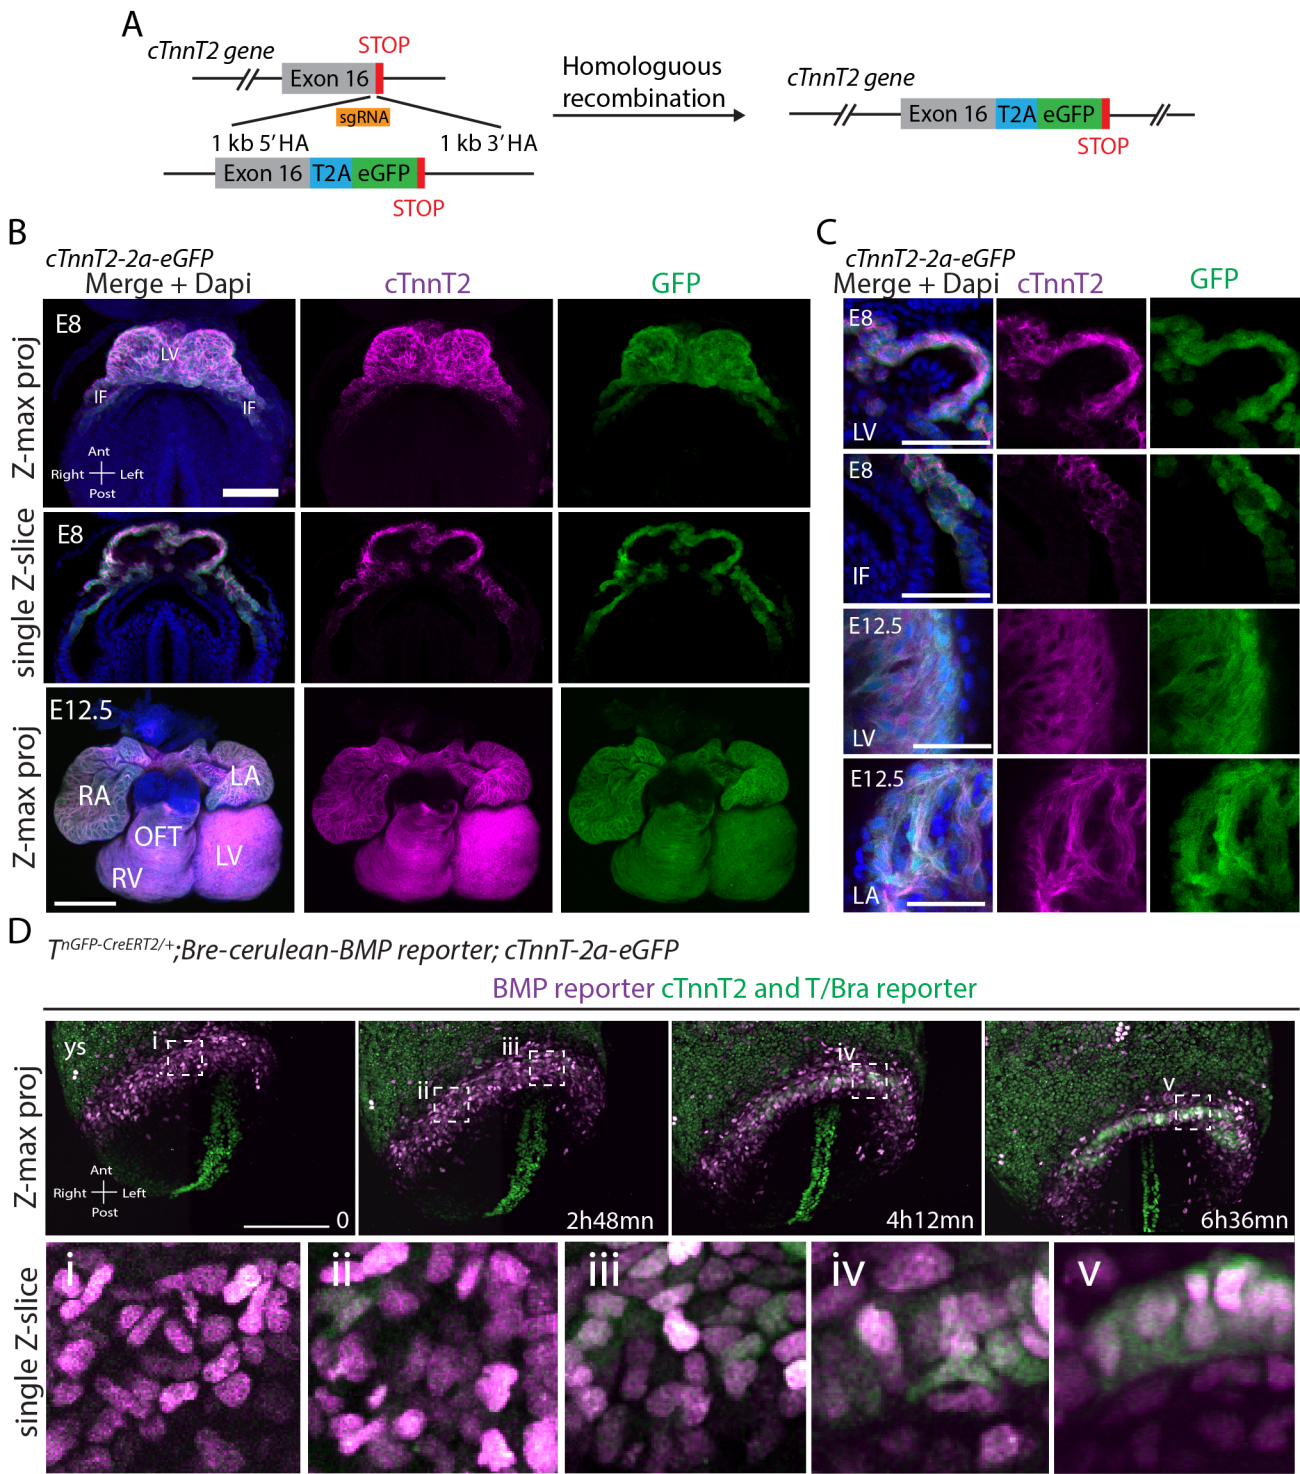

A

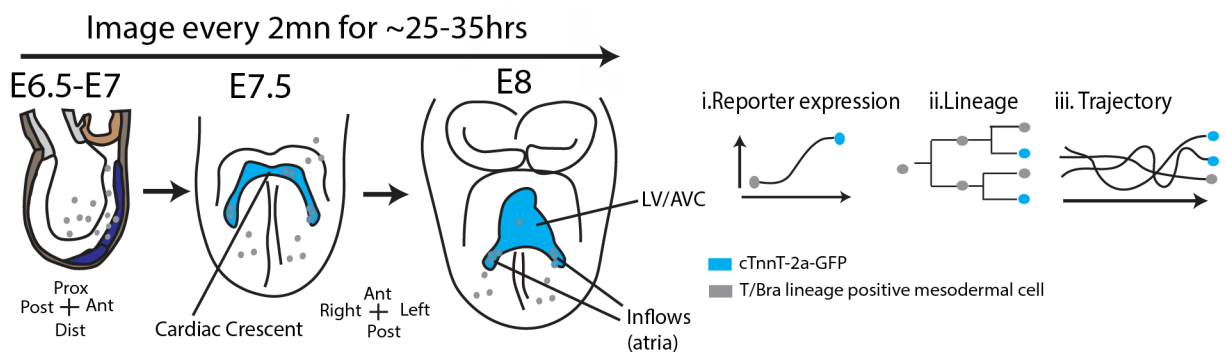

B

*TnGFP-CreERT2/+;R26<sup>tdtomato/+</sup>;cTnnT-2a-eGFP*

T/Bra expression reporter (PS and notochord) T/Bra lineage (mesoderm) cTnnT reporter (cardiomyocytes)

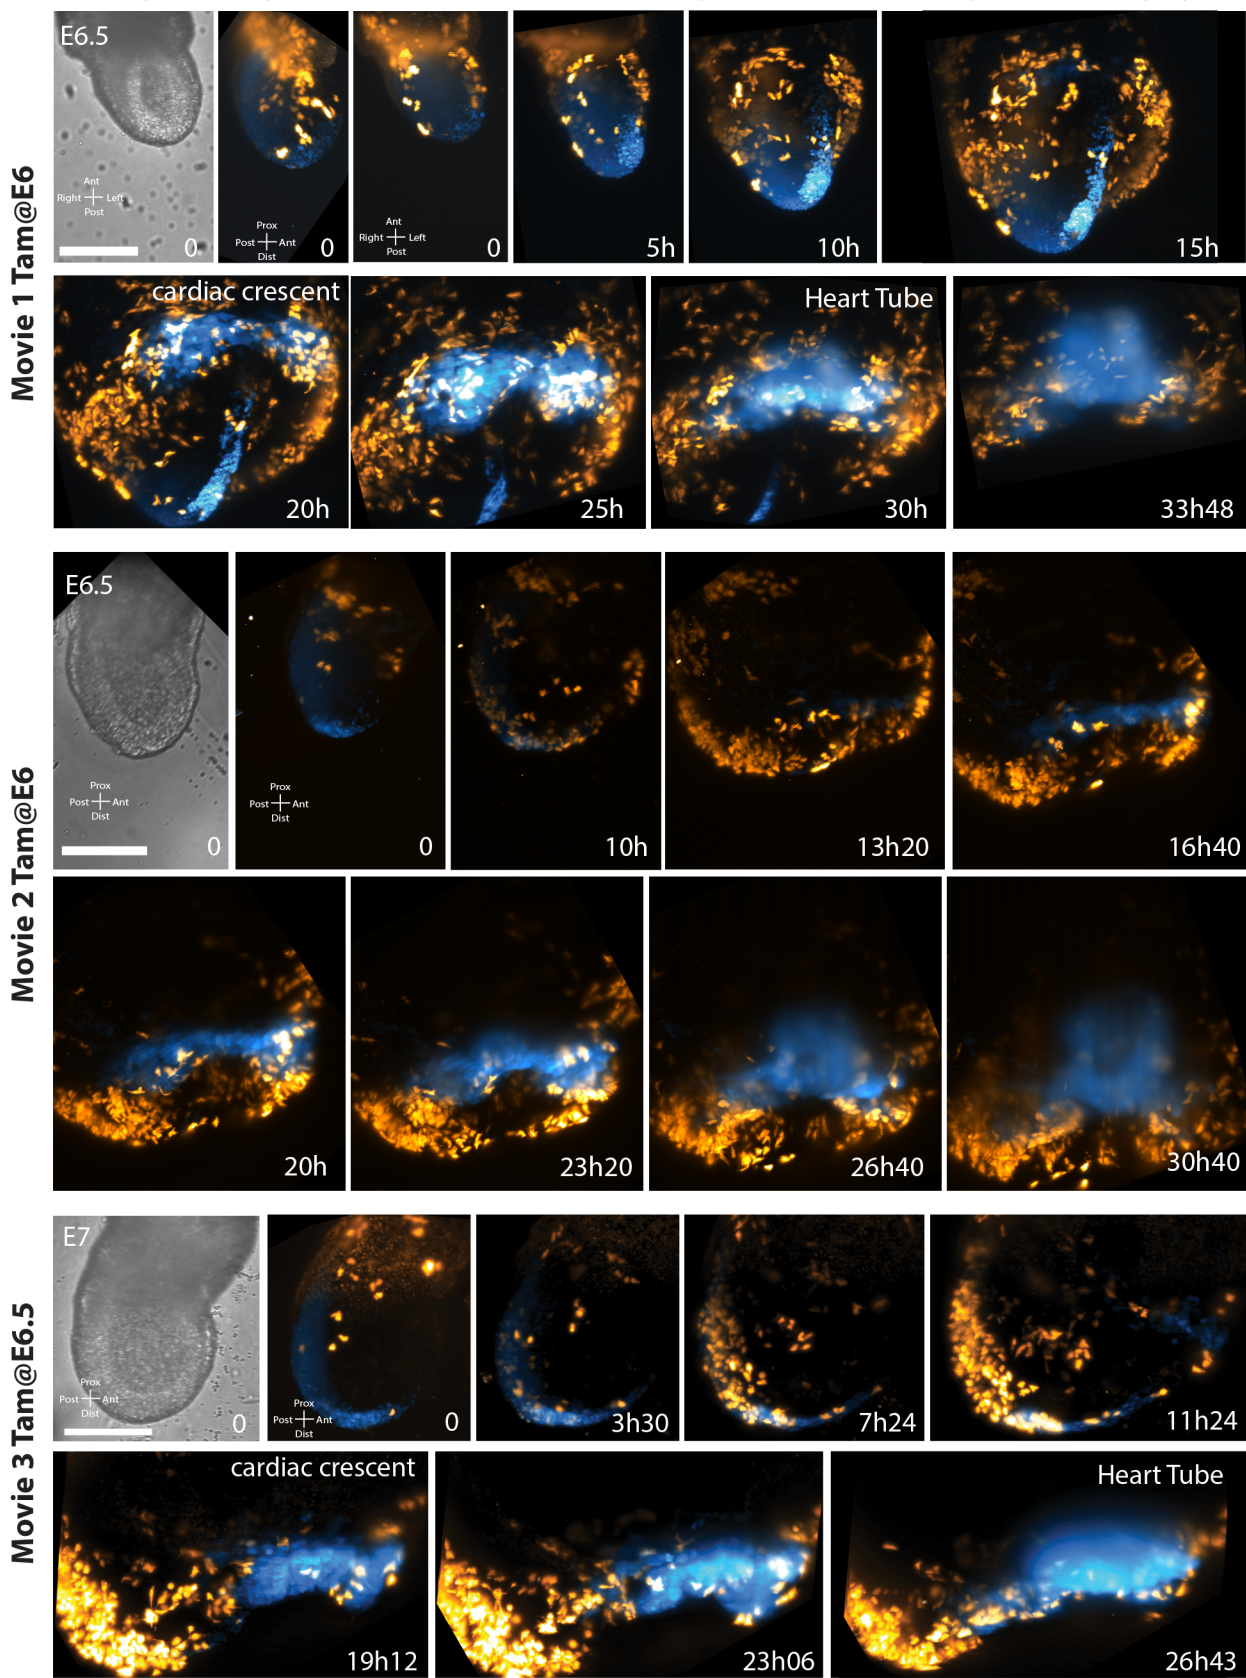

Figure 3

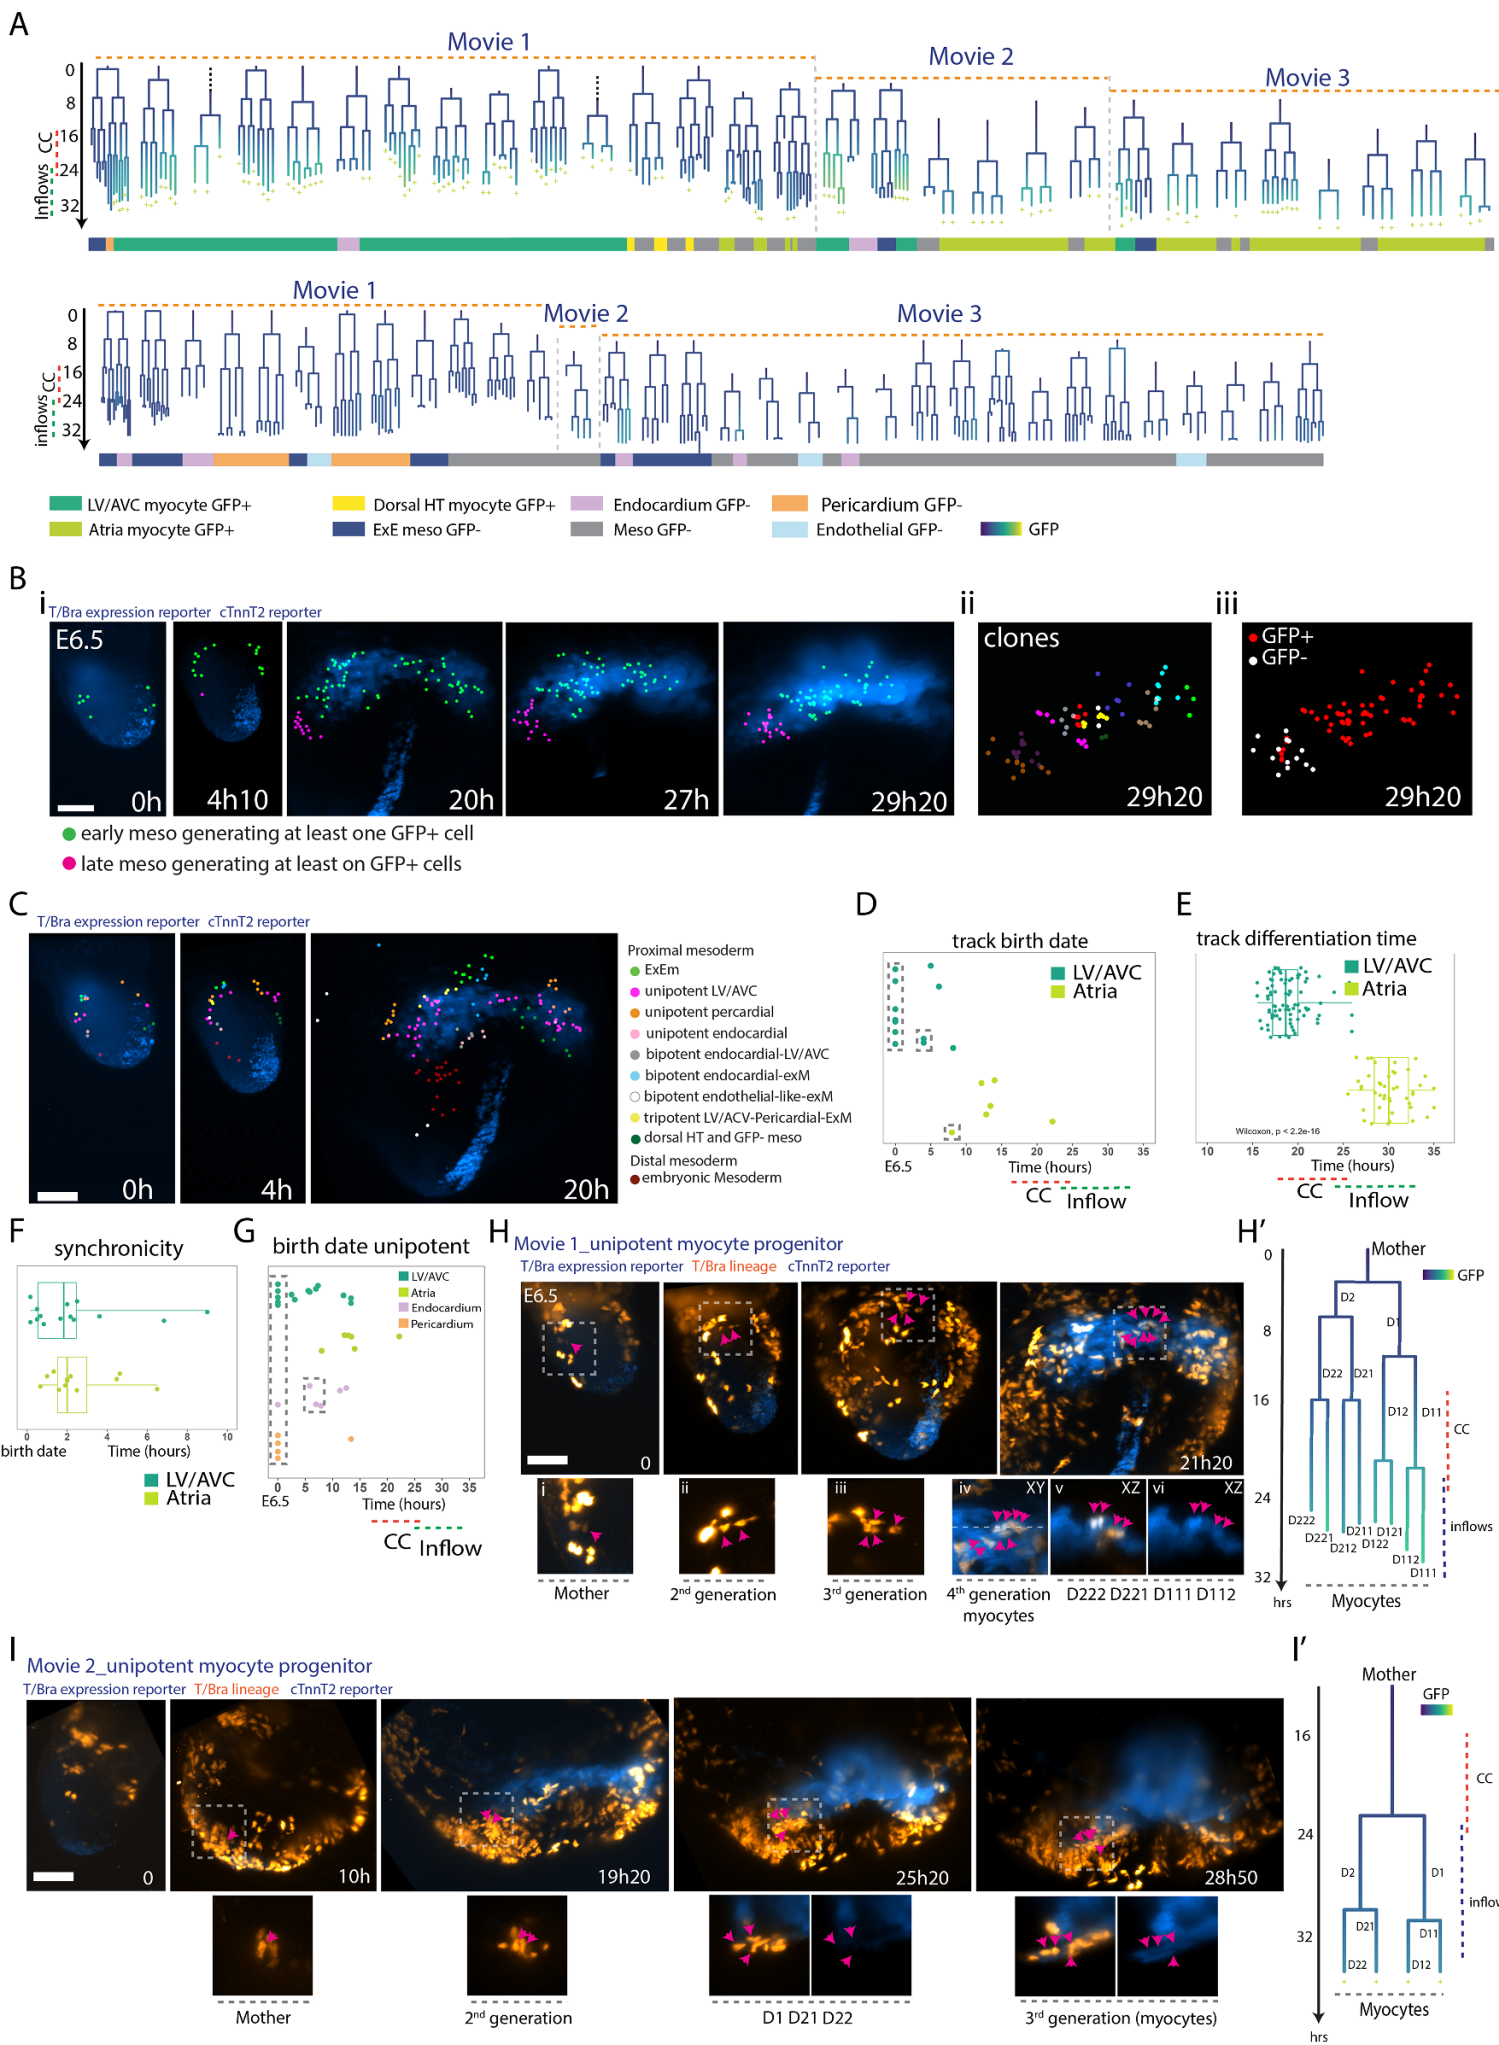

Figure 4

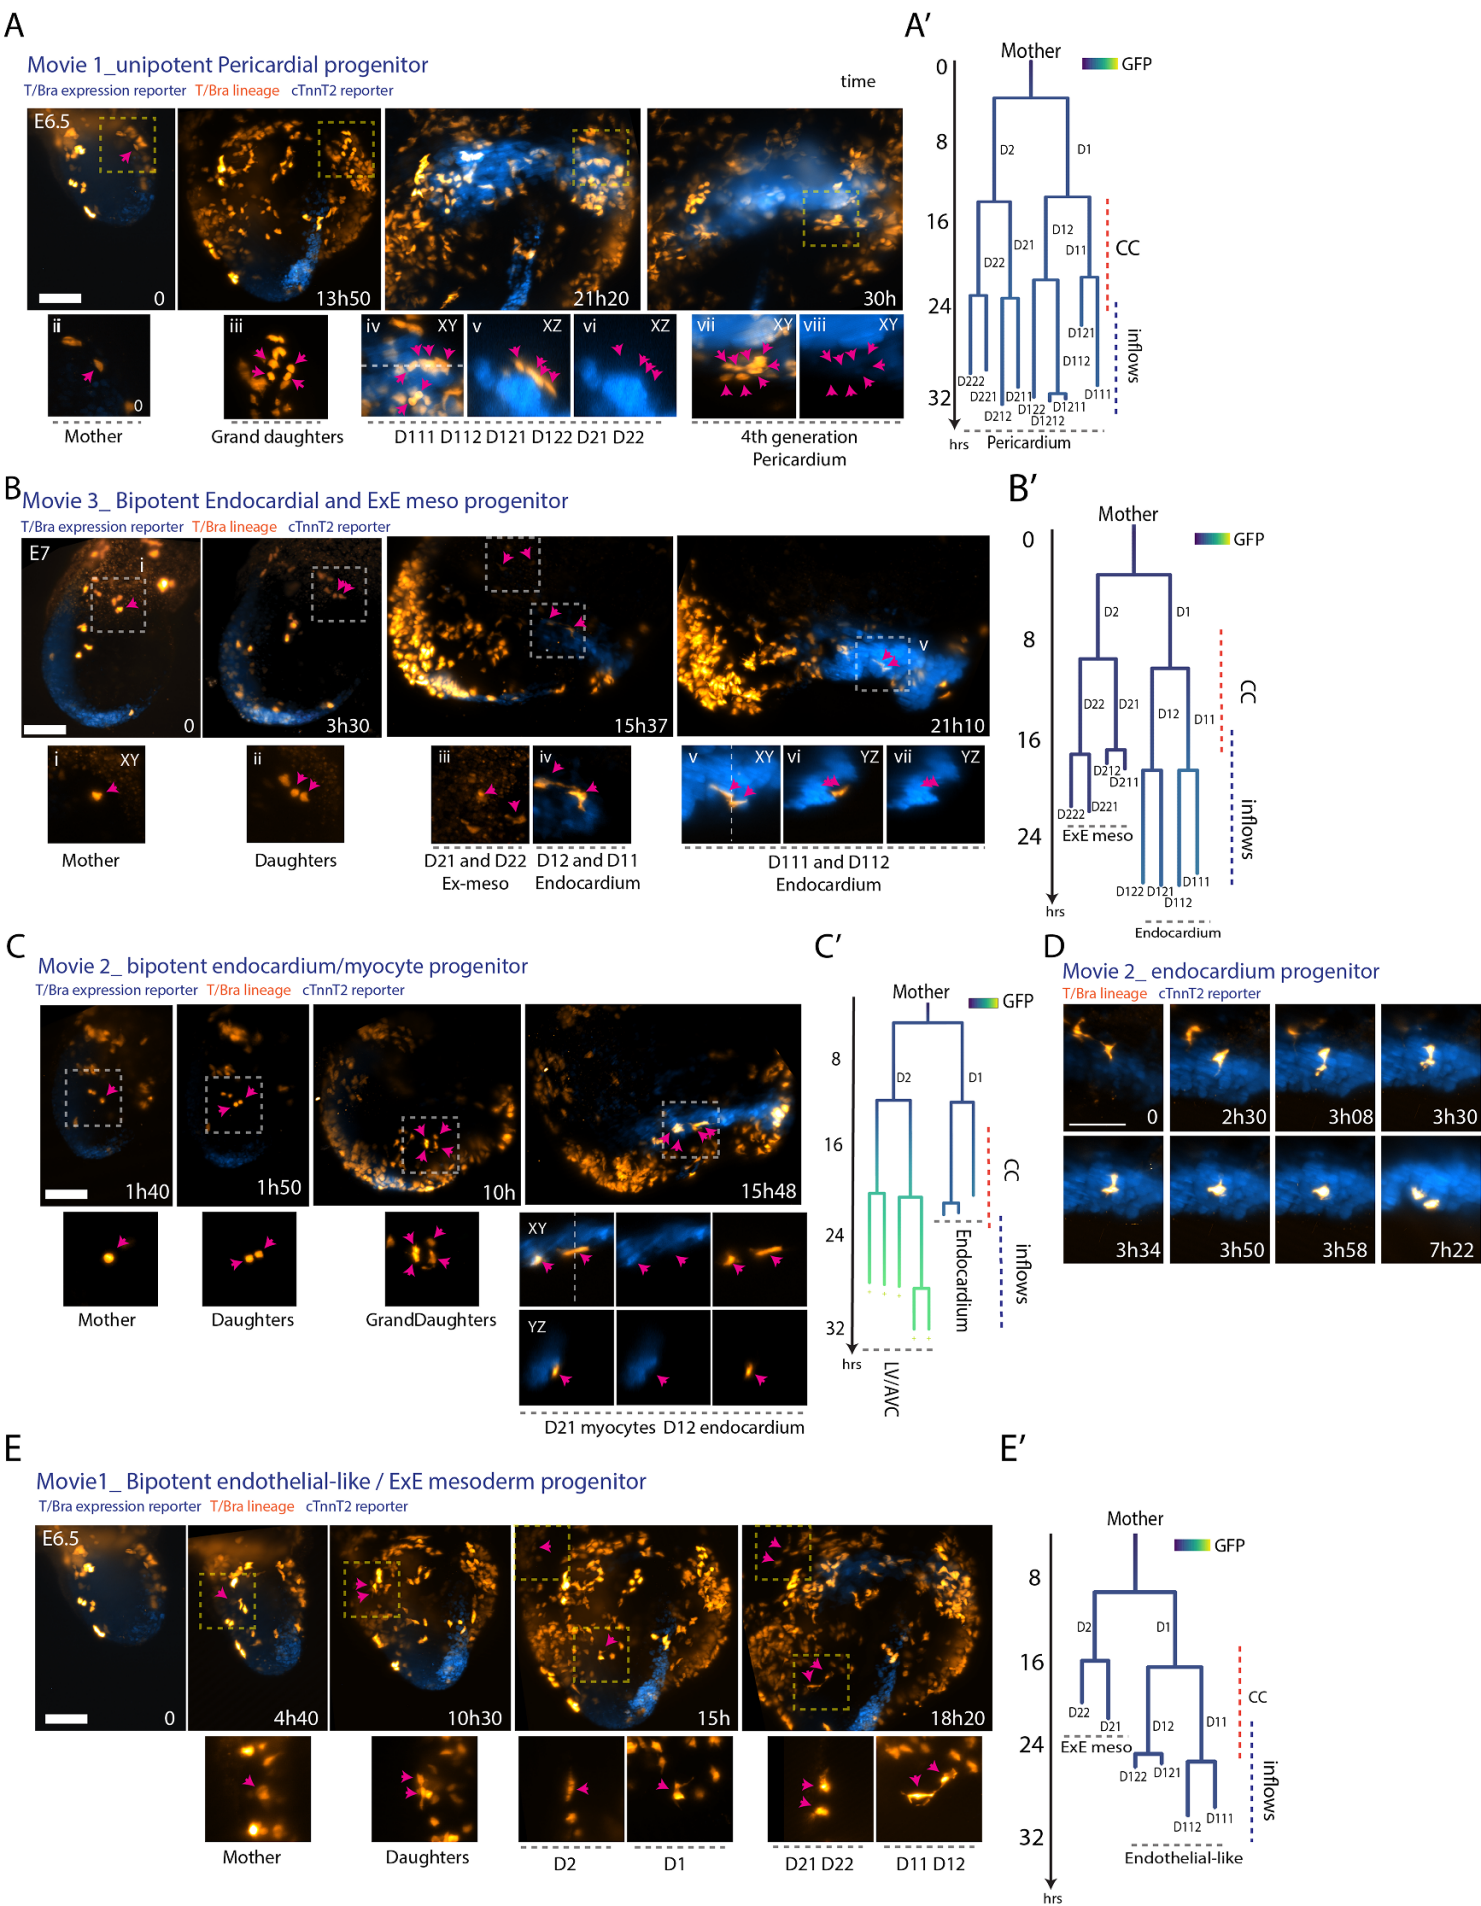



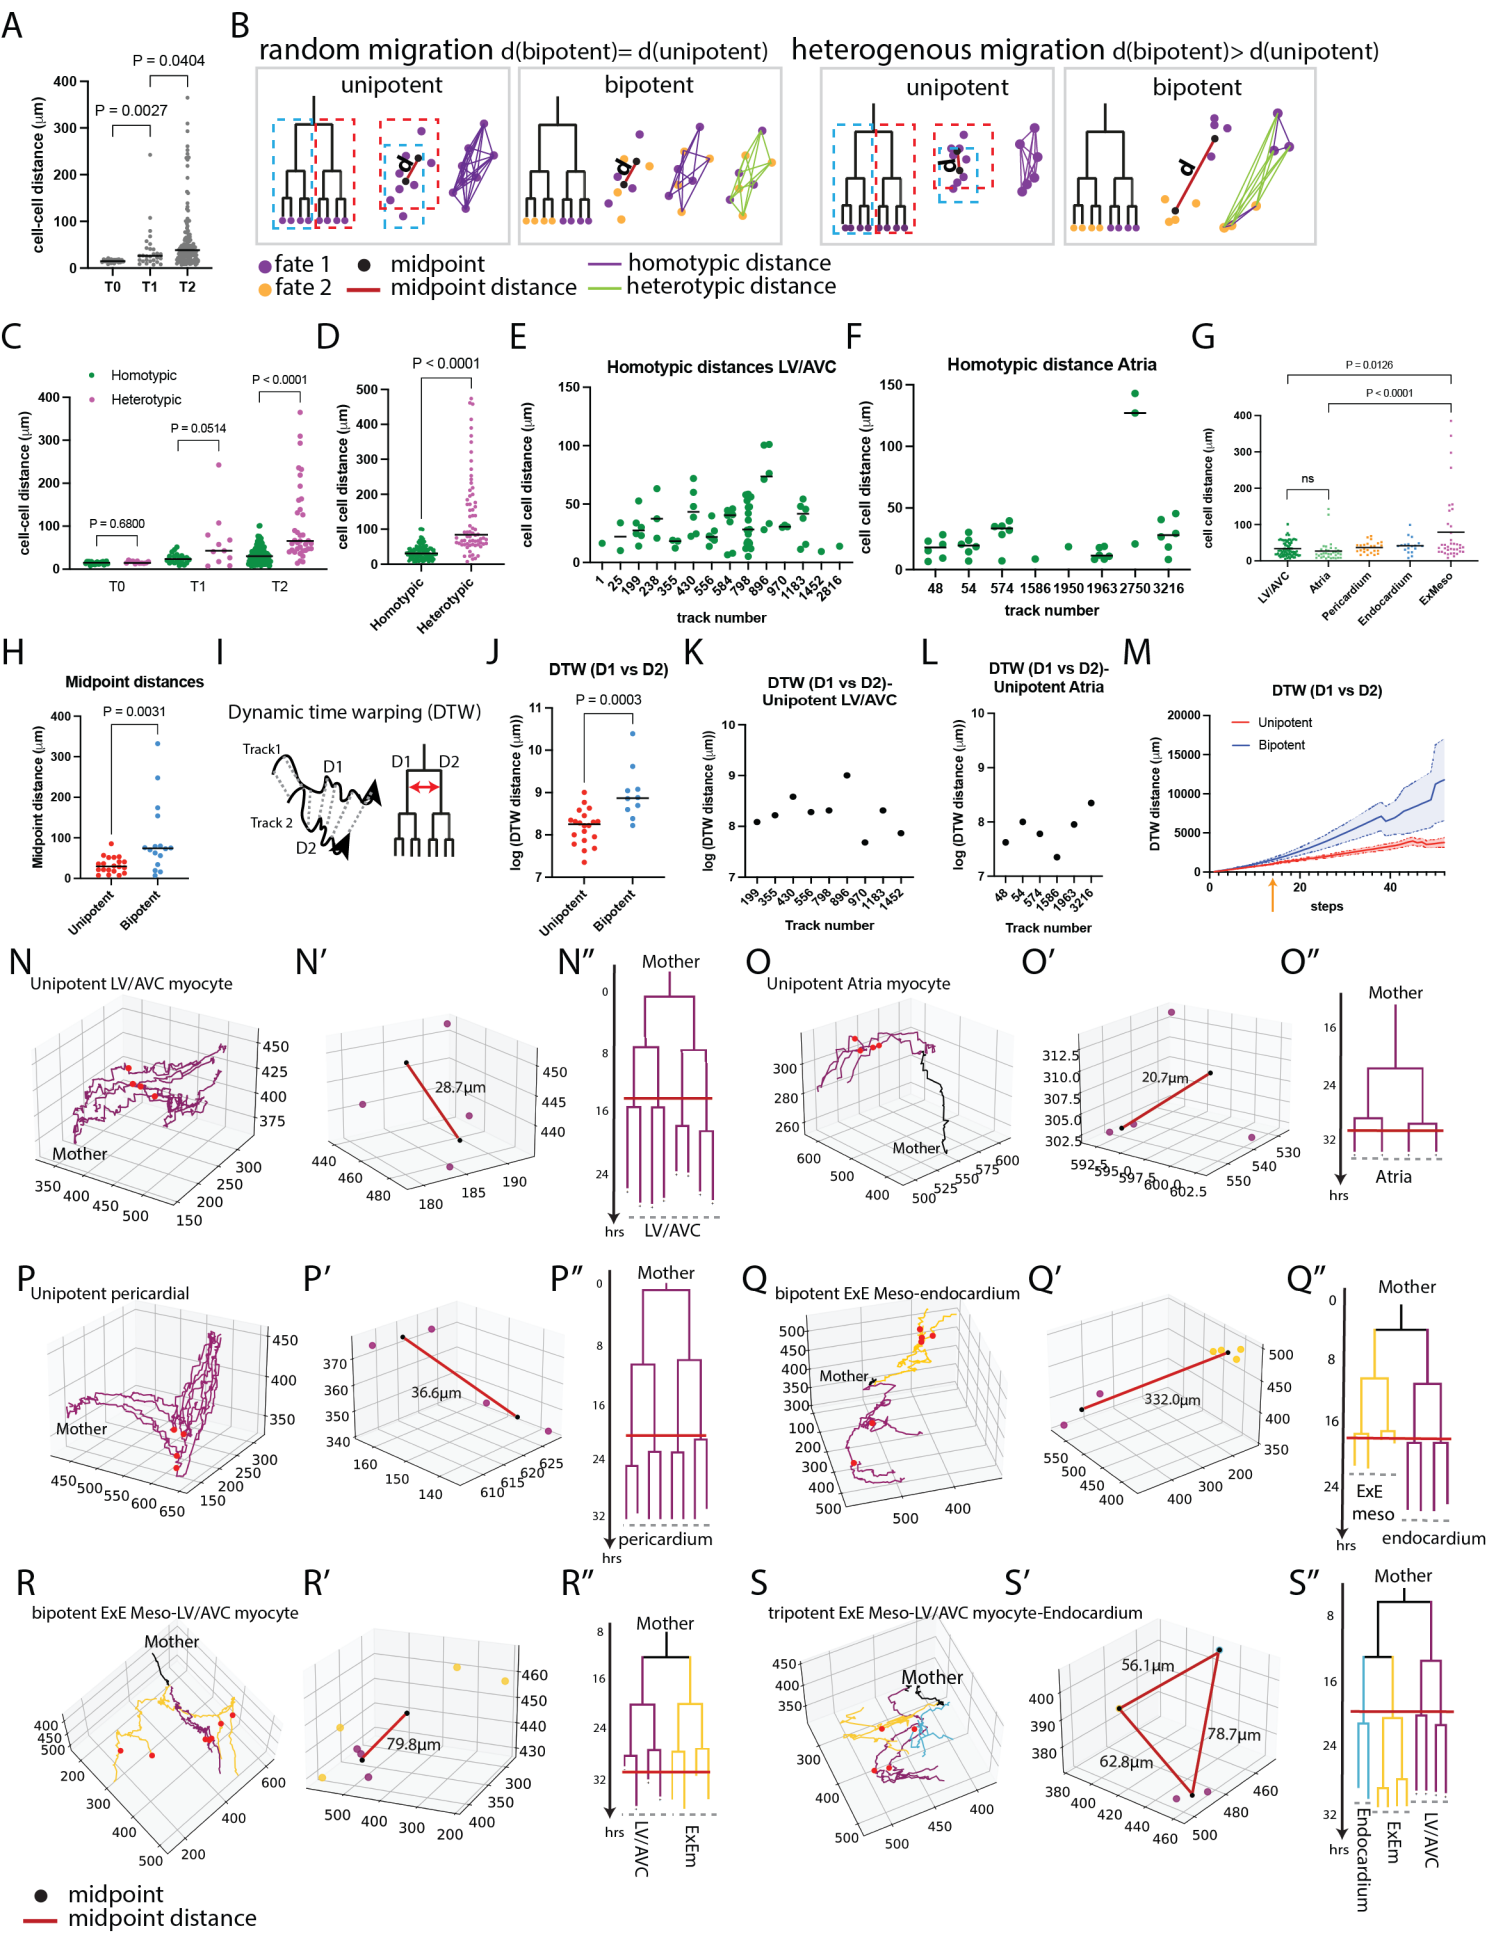

Figure 6

A

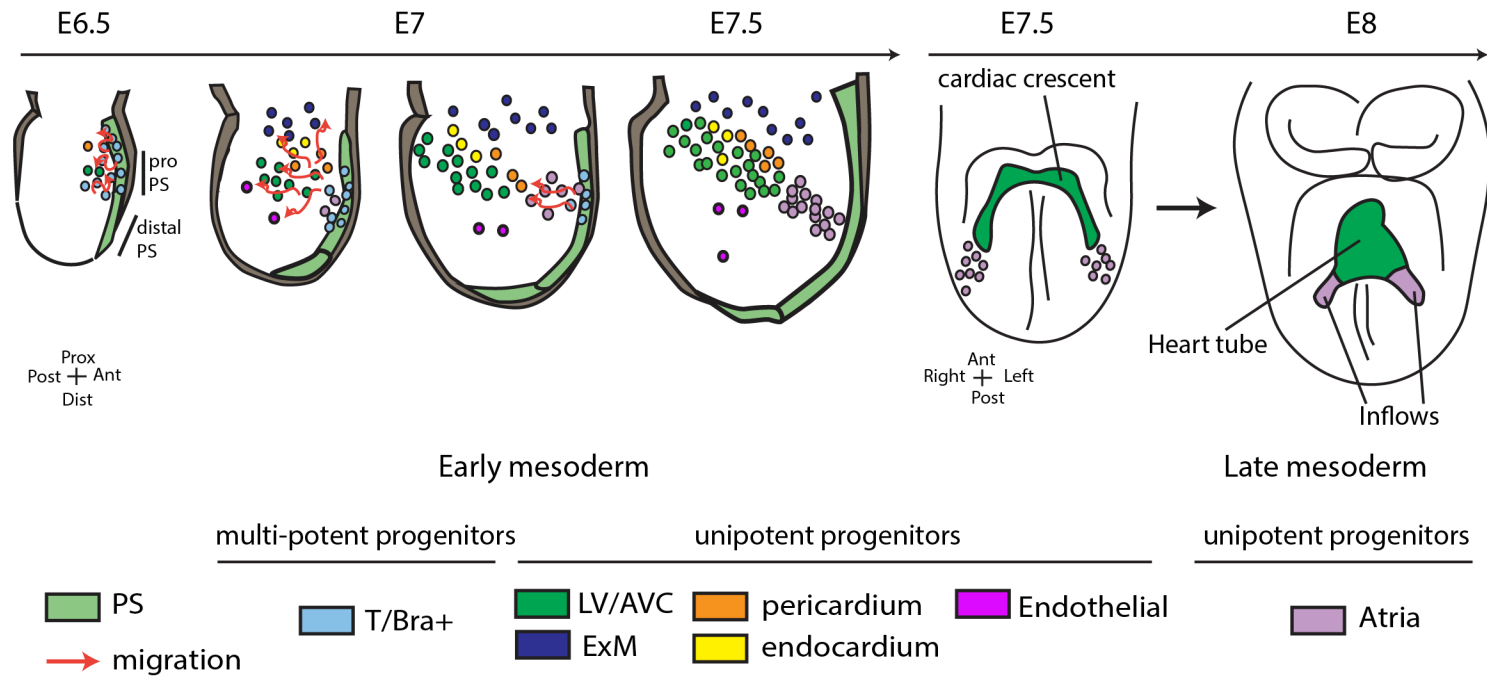

B

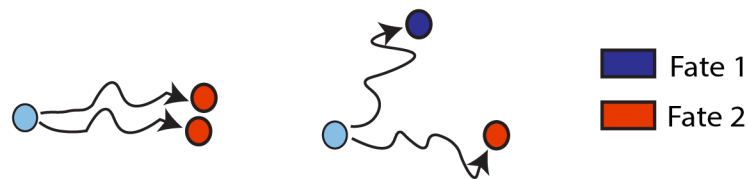

# Figure2\_supplementary figure 1

A

*TnGFP-CreERT2/+;R26<sup>tdtomato/+</sup>;cTnnT-2a-eGFP*

T/Bra expression reporter T/Bra lineage

Tam@E5.5

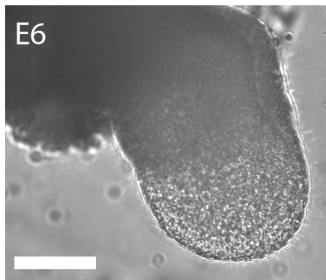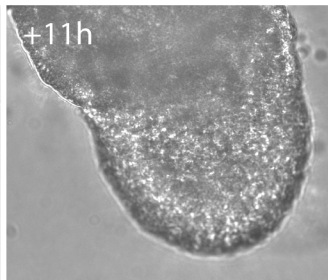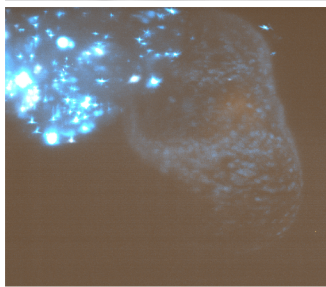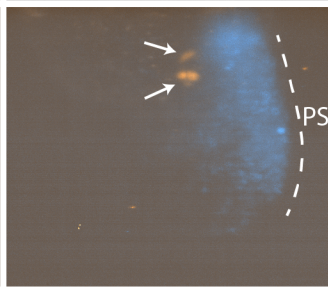

# Figure2\_supplementary figure 2

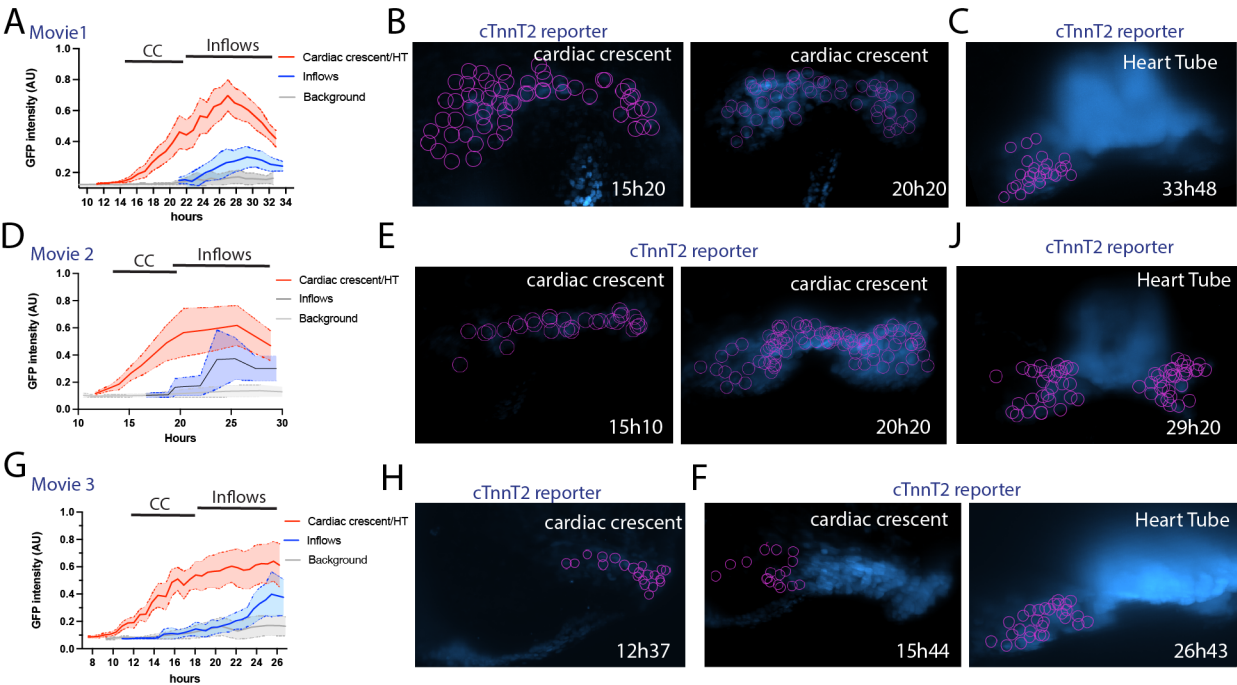

# Figure2\_supplementary figure 3

A

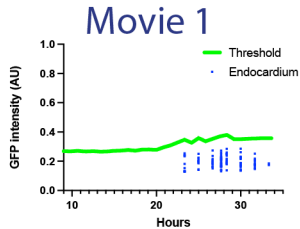

B

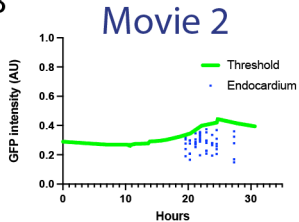

C

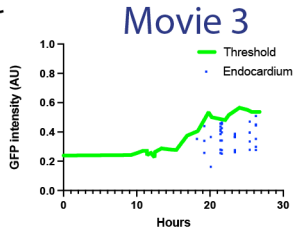

D

## Movie 3

T/Bra lineage cTnnT2 reporter

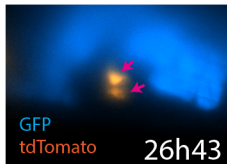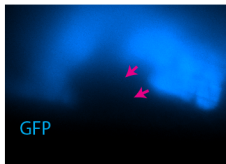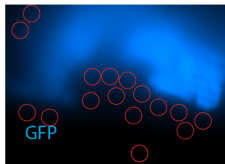

# Figure3\_supplementary figure 1

A

i T/Bra expression reporter cTnnT2 reporter

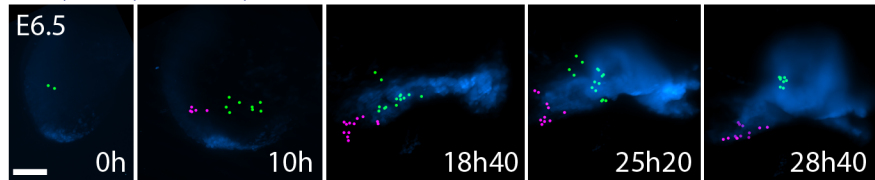

ii

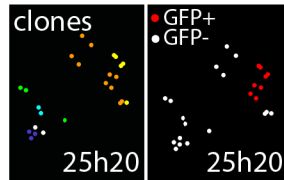

iii

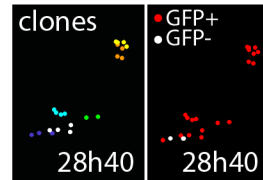

iv T/Bra expression reporter cTnnT2 reporter

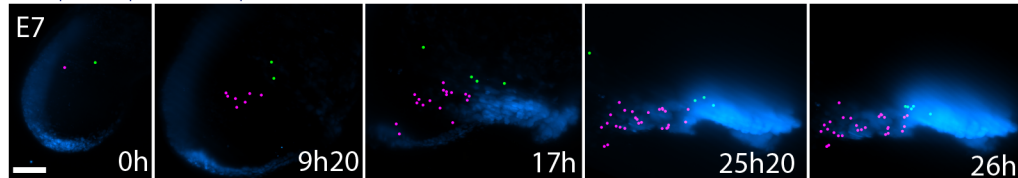

v

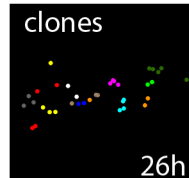

vi

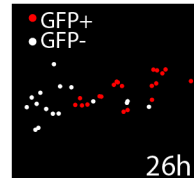

● early meso  
● late meso

# Figure4\_supplemental figure 1

A

Movie 3\_tripotent exMeso/endocardium/myocyte progenitor

T/Bra expression reporter T/Bra lineage cTnnT2 reporter

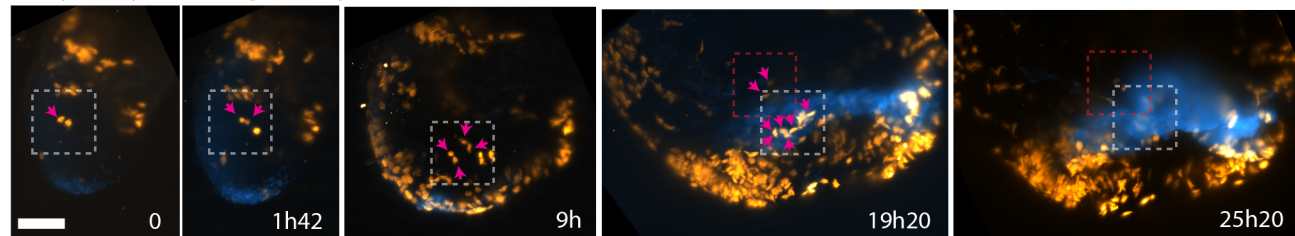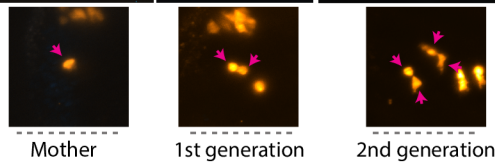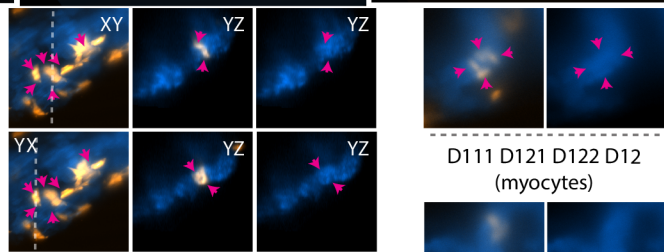

D111 D121 D122 D12  
(myocytes)

D111 D112 D121 D122 (myocytes)

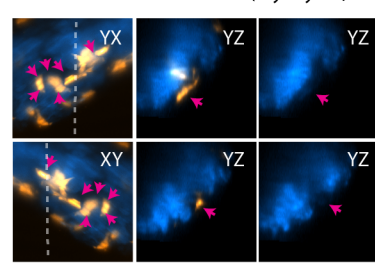

D222 D221 (endocardium)

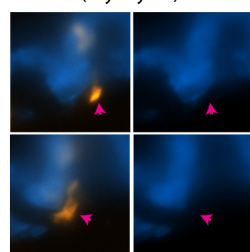

D222 D221 (endocardium)

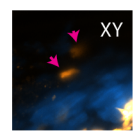

D211 D212  
ExMeso

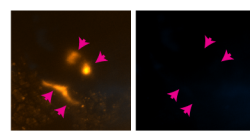

D2111 D2112 D2121 D2122  
(ExMeso)

B

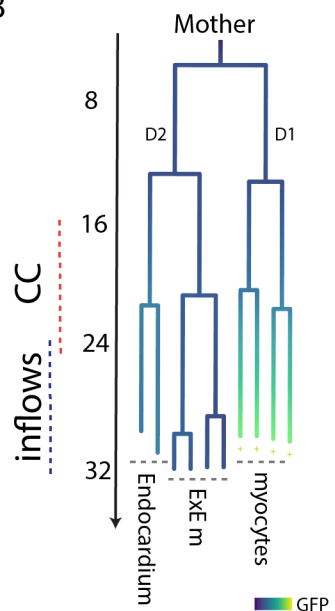

3rd generation

Figure5\_supplementary figure 1

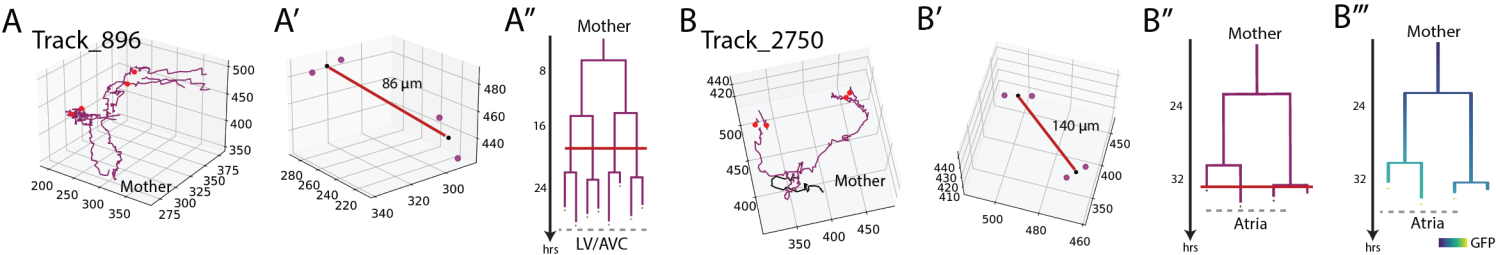

**C**

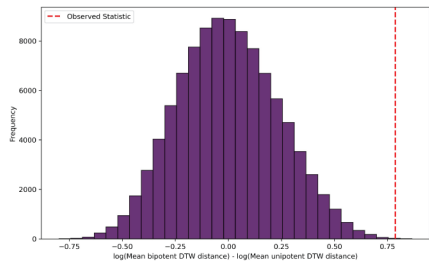

Source: https://www.biorxiv.org/content/10.1101/2023.12.19.572445.full.pdf
